# Supplementary material for: Preparedness for peer first response to mining emergencies resulting in injuries: a cross-sectional study
Source: PubMed Central journal article supplement — BMJ Open. 2020 Nov 12;10(11):e036094. doi: 10.1136/bmjopen-2019-036094 (PMC7662425; doi:10.1136/bmjopen-2019-036094), 2020-11-12
Supplement: bmjopen-2019-036094.draft_revisions.pdf [file bmjopen-2019-036094.draft_revisions.pdf]

# BMJ Open

BMJ Open is committed to open peer review. As part of this commitment we make the peer review history of every article we publish publicly available.

When an article is published we post the peer reviewers' comments and the authors' responses online. We also post the versions of the paper that were used during peer review. These are the versions that the peer review comments apply to.

The versions of the paper that follow are the versions that were submitted during the peer review process. They are not the versions of record or the final published versions. They should not be cited or distributed as the published version of this manuscript.

BMJ Open is an open access journal and the full, final, typeset and author-corrected version of record of the manuscript is available on our site with no access controls, subscription charges or pay-per-view fees (<http://bmjopen.bmj.com>).

If you have any questions on BMJ Open's open peer review process please email [info.bmjopen@bmj.com](mailto:info.bmjopen@bmj.com)

# BMJ Open

## Preparedness for peer first response to mining emergencies with injuries: a cross-sectional study

|                               |                                                                                                                                                                                                                                                                                                                                                                                                                                                                                                                                                                                                                           |
|-------------------------------|---------------------------------------------------------------------------------------------------------------------------------------------------------------------------------------------------------------------------------------------------------------------------------------------------------------------------------------------------------------------------------------------------------------------------------------------------------------------------------------------------------------------------------------------------------------------------------------------------------------------------|
| Journal:                      | <i>BMJ Open</i>                                                                                                                                                                                                                                                                                                                                                                                                                                                                                                                                                                                                           |
| Manuscript ID                 | bmjopen-2019-036094                                                                                                                                                                                                                                                                                                                                                                                                                                                                                                                                                                                                       |
| Article Type:                 | Original research                                                                                                                                                                                                                                                                                                                                                                                                                                                                                                                                                                                                         |
| Date Submitted by the Author: | 29-Nov-2019                                                                                                                                                                                                                                                                                                                                                                                                                                                                                                                                                                                                               |
| Complete List of Authors:     | Karlsson, Sofia; Umeå Universitet Medicinska fakulteten, Department of Surgical and Perioperative Sciences, Surgery<br>Saveman, Britt-Inger; Umeå Universitet Medicinska fakulteten, Department of Surgical and Perioperative Sciences, Surgery<br>Hultin, Magnus; Umeå University, Department of Surgical and Perioperative Sciences, Anaesthesiology and Intensive Care<br>Björnstig, Ulf; Umeå Universitet Medicinska fakulteten, Department of Surgical and Perioperative Sciences, Surgery<br>Gyllencreutz, Lina; Umeå Universitet Medicinska fakulteten, Department of Surgical and Perioperative Sciences, Surgery |
| Keywords:                     | Trauma management < ORTHOPAEDIC & TRAUMA SURGERY, MEDICAL EDUCATION & TRAINING, ACCIDENT & EMERGENCY MEDICINE                                                                                                                                                                                                                                                                                                                                                                                                                                                                                                             |
|                               |                                                                                                                                                                                                                                                                                                                                                                                                                                                                                                                                                                                                                           |

SCHOLARONE™  
Manuscripts

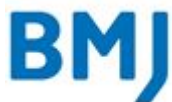

I, the Submitting Author has the right to grant and does grant on behalf of all authors of the Work (as defined in the below author licence), an exclusive licence and/or a non-exclusive licence for contributions from authors who are: i) UK Crown employees; ii) where BMJ has agreed a CC-BY licence shall apply, and/or iii) in accordance with the terms applicable for US Federal Government officers or employees acting as part of their official duties; on a worldwide, perpetual, irrevocable, royalty-free basis to BMJ Publishing Group Ltd ("BMJ") its licensees and where the relevant Journal is co-owned by BMJ to the co-owners of the Journal, to publish the Work in this journal and any other BMJ products and to exploit all rights, as set out in our [licence](#).

The Submitting Author accepts and understands that any supply made under these terms is made by BMJ to the Submitting Author unless you are acting as an employee on behalf of your employer or a postgraduate student of an affiliated institution which is paying any applicable article publishing charge ("APC") for Open Access articles. Where the Submitting Author wishes to make the Work available on an Open Access basis (and intends to pay the relevant APC), the terms of reuse of such Open Access shall be governed by a Creative Commons licence – details of these licences and which [Creative Commons](#) licence will apply to this Work are set out in our licence referred to above.

Other than as permitted in any relevant BMJ Author's Self Archiving Policies, I confirm this Work has not been accepted for publication elsewhere, is not being considered for publication elsewhere and does not duplicate material already published. I confirm all authors consent to publication of this Work and authorise the granting of this licence.

1  
2  
3 **Preparedness for peer first response to mining emergencies with injuries: a**  
4 **cross-sectional study**  
5  
6

7 Sofia Karlsson<sup>a</sup>, Britt-Inger Saveman<sup>a</sup>, Magnus Hultin<sup>b\*</sup>, Ulf Björnstig<sup>a</sup>, Lina Gyllencreutz<sup>a</sup>  
8 Umeå University, Umeå, Sweden

9 <sup>a</sup> Department of Surgical and Perioperative Sciences, Surgery, Umeå University, 901 87  
10 Umeå, Sweden.  
11  
12

13  
14 <sup>b</sup> Department of Surgical and Perioperative Sciences, Anesthesiology and Critical Care  
15 Medicine, Umeå University, 901 87 Umeå, Sweden.  
16  
17

18 \*Corresponding author  
19

20  
21 E-mail addresses: sofia.karlsson@umu.se (S. Karlsson), britt-inger.saveman@umu.se (B-I.  
22 Saveman), magnus.hultin@umu.se (M. Hultin), ulf.bjornstig@umu.se (U. Björnstig),  
23 lina.gyllencreutz@umu.se (L. Gyllencreutz)  
24  
25  
26  
27  
28  
29

30 Word count: 3311  
31

32 Number of figures: 1  
33  
34

35 Number of tables: 3  
36  
37  
38  
39  
40  
41  
42  
43  
44  
45  
46  
47  
48  
49  
50  
51  
52  
53  
54  
55  
56  
57  
58  
59  
60

## ABSTRACT

**Objective** Identify factors of importance for being prepared for a peer first response to underground mining emergencies with injuries.

**Design** Cross-sectional questionnaire study of Swedish underground mineworkers.

**Setting** Seven out of nine Swedish underground mines.

**Participants** 741 mineworkers out of 1022 (73%) answered the questionnaire.

**Outcome measures** Level of preparedness for emergencies with injuries in underground mines.

**Results** Three factors emerged that influenced the preparedness of mineworkers' to peer first response; 1) *Familiarity with rescue procedures during emergencies with injuries*, 2) *Risk perception of emergencies with injuries*, 3) *Experience of using self-protective and first aid equipment*. Mineworkers of the opinion that they know how to handle emergencies with injuries and also have been trained in the use of self-protective and first aid equipment considered themselves to be better prepared for a peer first response compared to those not familiar with the rescue procedures or who had not used the self-protective and first aid equipment. However, mineworkers who rate the risk for emergencies with injuries as high considered themselves to be less prepared compared to those who rate the risk as low.

**Conclusion** In spite of mandatory training in first aid, mineworkers were only to some extent prepared to give first aid to their injured peers. To increase preparedness for peer first aid response in mine emergencies, a systematic program approach with contextualized and adapted first aid courses, and training the mineworkers in relevant emergency scenarios, might be used to allow the mineworkers to become confident in how to perform peer first aid.

### Strengths and limitations of this study

- The study included seven out of nine underground mines in Sweden.

- High response rate (73%).
- Although the questionnaire was evaluated with a face validity test with mineworkers with relevant experience, a more comprehensive pilot study may have improved the questionnaire, as would a test/retest or random response test.
- This study is based on data from the mineworkers' self-assessed level of preparedness. A knowledge test or observation at a full-scale practical exercise could have been performed to obtain more objective measures, but was considered too resource intensive in the present study.

Keywords: Trauma management, Medical education & training, Accident & Emergency medicine.

## INTRODUCTION

Mining emergencies are infrequent but may have severe consequences for mineworkers (see Table 1 for definition), thus they require an efficient and timely response.<sup>1 2</sup> The most common emergencies in mineral and metalliferous underground mines are fires, vehicle incidents and rock-falls.<sup>3</sup> Mine rescues take time regardless of whether the mining companies have their own mine rescue teams, as in most European countries, or if it is the responsibility of the local rescue services and emergency medical service (EMS), which is common in Sweden.<sup>4 5</sup> Time is lost as the rescue service has a long distance to travel to the remote mine<sup>5</sup> and furthermore, the rescue personnel must reach the site of the incident, which could be far underground.<sup>6</sup> Time-consuming rescue operations could be fatal for severely injured victims.<sup>7</sup> Reaching the incident site in a mine will consume time for the rescue organizations<sup>7</sup>, which is why mineworkers close to the injured have to act as peer first responders. In a worst-case scenario, mineworkers might be inside a refuge chamber within a smoke-filled area several hundred meters underground with a severely injured peer. The only option might be to wait for the rescue service or mine rescue team. Thus, they have to be prepared to take care of the moderately or severely injured peer until help arrives. Essential knowledge, skills and equipment are of utmost importance.<sup>8</sup> The combination of being a peer to the victim and being unskilled at handling injuries may lead to emotional distress that might impede their actions.<sup>9</sup>

Strong recommendations have been made in order for mineworkers to be able to escape or be rescued during emergencies<sup>10</sup>, because a lack of knowledge may have fatal consequences. For example, in the Sago mine explosion in 2006<sup>11</sup>, 12 mineworkers died. These workers lacked knowledge of how to use self-contained self-rescuers.<sup>12</sup> Prior training or experience of incidents have each been shown to result in a better state of preparedness, and to influence action during the infrequent incidents that have had severe consequences.<sup>2</sup> Those with prior

1  
2  
3 experience of escaping from a smoke-filled mine reported feeling less stress during an  
4  
5 exercise under similar conditions, while mineworkers lacking this experience generally act  
6  
7 more on intuition than prior knowledge.<sup>13</sup>  
8  
9

10 Swedish mining companies aim to prevent and mitigate incidents, by focusing on risk  
11  
12 management, evacuation technology, and routes.<sup>14</sup> Preparedness to respond to incidents is  
13  
14 thus an essential element of any underground mine's strategic plan.<sup>15</sup> However, articles with  
15  
16 focus on the medical aspects and peer first response in mining emergencies with injuries are  
17  
18 scarce in literature.<sup>3</sup> This study aimed to identify factors of importance for being prepared for  
19  
20 peer first response to underground mining emergencies with injuries.  
21  
22  
23  
24

## 25 26 27 28 29 30 31 32 33 34 35 36 37 38 39 40 41 42 43 44 45 46 47 48 49 50 51 52 53 54 55 56 57 58 59 60

## METHOD

### Design

The design of this study is a national cross-sectional survey.

### Sample

Questionnaires (n=1,022) were distributed to seven participating mines between November 2016 and February 2017. The response rate was 73% (n=741) after excluding 29 individuals not working underground and 11 with more than ¼ internal missing variables. Table 1 describes the participants' characteristics.

INSERT TABLE 1 ABOUT HERE

### Questionnaire

The study-specific questionnaire in Swedish was purposely designed and constructed based on preparedness literature.<sup>16 17 3</sup> The questionnaire was constructed to capture the preparedness of the mineworkers for peer rescue and peer first aid of moderately or more severely injured peers until they were rescued during emergencies. Thus, the questions focused on the mineworkers' self-perceived knowledge of injuries and first aid, their first aid



1  
2  
3 training and equipment, and the presumed risks of mining incidents, particularly concerning  
4  
5 fires, vehicle incidents and rock-falls. Answers to the questions were either yes/no or on a  
6  
7 five-item Likert scale (Table 2). The face validity of the questionnaire was tested on three  
8  
9 mineworkers. The relevance and validity of the items and the questionnaire were discussed  
10  
11 during several seminars in an iterative process by the research group.  
12  
13

14  
15 INSERT TABLE 2 ABOUT HERE  
16

## 17 **Data collection**

18  
19 Sweden has 14 mineral and metal mines, nine of which are underground. Contact was made  
20  
21 with the nine underground mine managers. Written information about the study and the  
22  
23 questionnaire was sent to the managers for their informed consent. The main unions were also  
24  
25 notified about the study. Seven out of nine mine managers agreed to participate and were sent  
26  
27 questionnaires for all employed mineworkers working underground. The mine managers were  
28  
29 responsible for the distribution and collection of the questionnaires. A letter was attached to  
30  
31 each questionnaire informing the mineworkers that their participation was voluntary. By  
32  
33 completing the questionnaire, the respondents gave their informed consent.  
34  
35  
36  
37

## 38 **Analysis**

### 39 *Descriptive analysis and data management*

40  
41 First, a descriptive analysis of the data was performed, including minimum and maximum,  
42  
43 mean, standard deviation, skewness and kurtosis. The descriptive analysis indicated that all  
44  
45 questions had less than 10% missing values. Imputation with an expectation maximisation  
46  
47 estimation was performed to impute the missing data.<sup>18</sup>  
48  
49

50  
51 A significance level of 0.05 was used throughout the study. In this study, SPSS Statistics  
52  
53 Version 24<sup>19</sup> was used to impute the data with an expectation maximisation estimation, and  
54  
55 Stata Statistical Software Release 14<sup>20</sup> was used for all other analyses.  
56  
57  
58  
59  
60

### *Exploratory factor analysis*

Exploratory factor analysis was performed for data reduction purposes and to find the latent factors that make the manifest variables covary.<sup>21</sup> When conducting the exploratory factor analysis, six factors had eigenvalues  $>1$ . However, when comparing the constructs, and studying the resulting scree plot (Figure 1), a decision was made to retain the three factors with an eigenvalue  $>2$ . This decision was made due to the opportunity to form relevant and meaningful factors and that the scree plot starts to level out after three factors. The three retained factors were rotated using Promax and a threshold of 0.5 was chosen for the factor loadings. A value of 0.5 indicates a strong loading for the items.<sup>21</sup>

INSERT FIGURE 1 ABOUT HERE

Thereby, the items with a minimum loading of 0.5 from the first, second and third factors were added together. The three factor solution is shown in Table 3. Cronbach's alpha and average inter-item correlation was for Factor 1 0.86 and 0.41, for Factor 2 0.87 and 0.41 and for Factor 3 0.80 and 0.37.

INSERT TABLE 3 ABOUT HERE

The three factors illustrate mineworkers' medical peer response preparedness. They were: 1) *Familiarity with rescue procedures during emergencies with injuries*, containing the questions Q3, Q4a-Q4d and Q5a-Q5d 2) *Risk perception of emergencies with injuries*, covering the questions Q2, Q6a-Q6e and Q7a-Q7d, and 3) *Experience of using self-protective and first aid equipment* containing questions covering Q1a stretcher, bandages, splints, eye rinse, defibrillators, self-contained self-rescuers and fire extinguishers.

### *Multiple logistic regression*

In the multiple logistic regression, the three factors were used as independent variables and "Do you consider yourself prepared to respond (before the EMS or rescue personnel arrive at the incident site) to emergencies, e.g. fire, explosions or rock-falls in the mine?" was used as

1  
2  
3 the global dependent variable. The post-estimation tests of the Pearson  $\chi^2$  goodness-of-fit test  
4  
5 as well as the Hosmer-Lemeshow test were performed and were insignificant, indicating a  
6  
7 good model fit.<sup>22</sup>  
8  
9

### 10 *Participant and public involvement statement*

11  
12 Neither the public, nor the participants were involved in the design of this study. However,  
13  
14 the questionnaire was tested for face validity both from a mining employer and employee  
15  
16 perspective.  
17  
18  
19

## 20 RESULTS

21 Below are some highlights of how the mineworkers answered the questionnaire (Table 2).  
22  
23

24 Eighty-one percent of the mineworkers consider there to be some risk to a very high risk to  
25  
26 injure themselves at their workplace. When asked what kind of major incident scenarios they  
27  
28 thought were likely, eighty percent of the mineworkers considered there to be some risk to a  
29  
30 very high risk of a major fire incident that would require the rescue service to be contacted.  
31  
32

33 One fourth (25%) of the mineworkers consider there to be a high or very high risk for  
34  
35 moderate or more serious injury during major fire incidents. While major fires were  
36  
37 considered to be probable, explosions were not considered as likely. Sixty-eight percent of the  
38  
39 mineworkers consider there to be a low or very low risk of major explosions involving injury  
40  
41 and 57% of the mineworkers think there is a low or very low risk of major explosions leading  
42  
43 to moderate or more serious injury or death. The mineworkers also answered whether they  
44  
45 considered their mine to be prepared for an underground incident involving multiple injured  
46  
47 mineworkers. Eighty-six percent of the mineworkers believed their mine to be prepared from  
48  
49 some extent to a very high extent.  
50  
51  
52  
53

54 Seventy-nine percent of the mineworkers considered themselves to be prepared to respond in  
55  
56 the event of an emergency. A third of the mineworkers (33%) considered that they to a high  
57  
58 or very high extent would know how to act if they witness a peer crashing a vehicle and  
59  
60

1  
2  
3 become moderately or more seriously injured. Thirty-eight percent would also to a high or  
4 very high extent know what to do if a truck catches fire with the driver being trapped in the  
5 vehicle and 56% would to some extent know what to do. Forty-three percent of the  
6  
7  
8 mineworkers knew how to act if a peer would suffer cardiac arrest. Almost all (91%) of the  
9  
10  
11 mineworkers reported that they had received first aid training and 22% of the mineworkers  
12  
13  
14 had experience in helping an injured peer. However, if a peer was moderately or more  
15  
16  
17 severely injured, only 27% considered themselves to a high or very high extent be able to  
18  
19  
20 help. Nearly two-thirds (60%) of the mineworkers thought that they to some extent would  
21  
22  
23 know how to give peer first aid response and help a moderately or more severely injured peer.

24  
25 In order to be able to help injured peers, the mineworkers have to have knowledge, access to  
26  
27 and confidence in using several different kinds self-protective and first aid equipment. Just to  
28  
29 name a few, 68% had access to a stretcher, about one fourth (24%) of the mineworkers had  
30  
31  
32 ever used one and 55% considered themselves comfortable using it. Seventy-five percent of  
33  
34  
35 the mineworkers considered themselves to be comfortable using bandages and 25%  
36  
37  
38 considered themselves to be comfortable using splints. Eighty-five percent of the  
39  
40  
41 mineworkers had access to a defibrillator, 44% had ever used one and 60% considered  
42  
43  
44 themselves comfortable using it. Seventy-three percent of the mineworkers had used a fire  
45  
46  
47 extinguisher and almost all (95%) of them felt comfortable using it.

48  
49 These highlights show that a lot of interesting data has been collected. Therefore, the choice  
50  
51  
52 was made to further analyse the data through finding some encompassing factors, which could  
53  
54  
55 find the essence of the necessary preparedness of the mineworkers for peer first response.

56  
57  
58 The three constructed factors illustrate aspects and relevance of mineworkers' medical peer  
59  
60 first response preparedness. *Familiarity with rescue procedures during emergencies with injuries* include if the mineworkers know how to act during stressful situations when there has been an emergency, and a peer has been injured in the vicinity. *Risk perception of*

1  
2  
3 *emergencies with injuries* includes how the mineworkers interpret the perceived risk for  
4  
5 emergencies with injuries at their workplace. *Experience of using self-protective and first aid*  
6  
7 *equipment*, includes if the mineworkers have used/know how to use equipment, such as a  
8  
9  
10  
11  
12  
13  
14  
15  
16  
17  
18  
19  
20  
21  
22  
23  
24  
25  
26  
27  
28  
29  
30  
31  
32  
33  
34  
35  
36  
37  
38  
39  
40  
41  
42  
43  
44  
45  
46  
47  
48  
49  
50  
51  
52  
53  
54  
55  
56  
57  
58  
59  
60

If the mineworkers were familiar with the rescue procedures during emergencies with injuries, they also felt more prepared to respond before the rescue services and EMS arrive, compared to those not familiar with the rescue procedures (OR = 1.30, 95% CI 1.22-1.38). If the mineworkers considered there was a great risk of emergencies with injuries occurring there was also less probability that they felt prepared to respond, compared to those considering there was a low risk of incidents (OR= 0.95, 95% CI 0.91-0.98). If the mineworkers had experience of using their self-protective and first aid equipment, they were also more prone to respond, compared to those not having any experience in using their self-protective and first aid equipment (OR = 1.19, 95% CI 1.07-1.32). Thus, there were significant associations between the three factors of preparedness and the global variable of self-reported preparedness. The perceived level of preparedness increased if they were familiar with rescue procedures and had experience in using self-protective and first aid equipment, but their perceived level of preparedness decreased if they perceived there was a great risk for incidents.

## DISCUSSION

(i) *Familiarity with rescue procedures during emergencies with injuries*, (ii) *risk perception of emergencies with injuries* and (iii) *experience of using self-protective and first aid equipment* were of importance for mineworkers perceived level of preparedness for emergencies with injuries.

1  
2  
3 This study showed that 30% of the mineworkers considered there to be a high or very high  
4 risk and 51% considered there to be a moderate risk of sustaining injuries at their workplace.  
5  
6 Although 79% of mineworkers considered themselves to be prepared to respond in the event  
7  
8 of emergencies – and although virtually all of them had received first aid training – the  
9  
10 majority of them (60%) considered that they merely to some extent would know how to help  
11  
12 an injured peer. There might be a risk that this is an overestimation of their knowledge in  
13  
14 performing first aid.<sup>23</sup> However, other authors have also shown that, in general, people tend to  
15  
16 help but may have a low confidence in their first aid skills and training and have several other  
17  
18 barriers for delivering first aid, e.g. the worry of making mistakes, which could further harm  
19  
20 the injured person.<sup>23-25</sup> In line with our findings, training responders in first aid as  
21  
22 recommended by other authors,<sup>24 25</sup> could improve their self-confidence and willingness to  
23  
24 respond. The first aid training might focus on typical injuries and illnesses relevant for the  
25  
26 underground environment.  
27  
28  
29  
30  
31  
32

33 In this study, mineworkers familiar with the rescue procedures, also considered themselves to  
34  
35 be more prepared to respond to incidents before the rescue services and emergency medical  
36  
37 service arrive, compared to those not familiar with the rescue procedures. For example, at  
38  
39 least nine out of ten mineworkers knew partly or completely what to do if a vehicle crashes  
40  
41 and/or if it catches fire and the driver is moderately or more seriously injured. Preparing  
42  
43 mineworkers includes training them in e.g. using their self-contained self-rescuers or in  
44  
45 solving complex dilemmas during emergencies.<sup>2 26</sup> The Mine Safety Technology and Training  
46  
47 Commission<sup>10</sup> suggest that there are three skills that mineworkers must have in order to be  
48  
49 able to self-escape or be rescued: (i) have knowledge of escape/rescue technologies; (ii) have  
50  
51 mine-specific knowledge in order to be able to find the evacuation routes; and (iii) have  
52  
53 escape/rescue conceptual knowledge in order to be able to make difficult decisions in an  
54  
55 emergency situation. Therefore, in order to respond to and survive emergencies with injuries,  
56  
57  
58  
59  
60

1  
2  
3 they need to have comprehensive knowledge about rescue procedures and technologies. To  
4 facilitate the rescue of the injured, it would be an advantage if the mineworkers and the rescue  
5 personnel were training together.  
6  
7  
8  
9

10 The mineworkers in the present study were asked if they knew how to act in several difficult  
11 situations involving an injured peer (Table 2). Their answers indicate that the majority of the  
12 mineworkers considered themselves to be prepared to respond only to some extent. Their  
13 ability to respond includes also making sound decisions and judgements during stressful  
14 situations.<sup>27</sup> As in the present study, training the mineworkers in their emergency skills has  
15 been shown to increase their preparedness for handling emergencies.<sup>27</sup> However, the efficacy  
16 of the self-escape training in communication, collaboration, leadership development,  
17 responsibility and accountability may be limited due to both structural and individual  
18 factors.<sup>28</sup> Mineworkers responding to dilemmas about critical self-rescue and escape skills did  
19 not always choose the safest option, even though they understood the consequences of their  
20 choices.<sup>26</sup> Two difficult dilemmas included (i) leaving an injured mineworker behind and (ii)  
21 trying to rescue missing mineworkers during unsafe conditions.<sup>26</sup> Because mineworkers often  
22 respond to emergencies as a group,<sup>10</sup> they also have to make optimal decisions for the whole  
23 group to escape. Training the mineworkers to collaboratively make decisions and self-escape  
24 in simulated smoke may improve their ability to escape.<sup>10</sup> To further increase preparedness,  
25 testing the entire emergency response system would be beneficial.<sup>29</sup> Training the mineworkers  
26 may include both table top-exercises where the mineworkers can discuss different dilemmas  
27 and best practice when handling injuries, as well as full-scale scenario training.  
28  
29  
30  
31  
32  
33  
34  
35  
36  
37  
38  
39  
40  
41  
42  
43  
44  
45  
46  
47  
48  
49  
50

51 In the present study 30% of the mineworkers consider that there is a high or very high risk of  
52 sustaining injury at their workplace. The mineworkers also considered that major fires were  
53 more likely to occur than uncontrolled explosions. Mineworkers who consider there to be a  
54 significant risk of emergencies with injuries assess themselves as being less prepared to act  
55  
56  
57  
58  
59  
60

1  
2  
3 before the rescue and emergency medical services arrive, compared to those that consider  
4 there is a low risk. This is in line with the results of a study showing that first aid training can  
5 make the workers more aware of the hazards in their work-place.<sup>30</sup> Training has been shown  
6 to increase the likelihood of optimal behaviour and decrease the risk of injury,<sup>31</sup> but it needs  
7 to be context sensitive and consider the specific conditions at different mines,<sup>32</sup> as well as  
8 providing each mineworker with sophisticated training in evacuation strategies.<sup>12</sup> Thus,  
9 mining companies may consider this, particularly as mineworkers onsite are not only first  
10 responders, some of them also have duties as guides for the rescue services.<sup>33</sup> Although most  
11 of the mineworkers in present study have attended regular first aid courses, the connection to  
12 the underground mining incident panorama might not have been evident. Included in the first  
13 aid course could also be discussions of the psychological strain that emergencies with injuries  
14 could impose on the mineworkers. It may be necessary for the mineworkers to help a  
15 moderately or more severely injured peer in a rescue chamber for a long time before the  
16 rescue and emergency services arrive. The peers may feel helpless because they are unable to  
17 provide the appropriate level of care to the injured.<sup>12</sup> Although 60% of the mineworkers in the  
18 present study felt comfortable using a defibrillator, if they would have to perform  
19 cardiopulmonary resuscitation they may feel exposed and powerless.<sup>34</sup> Therefore, adjusting  
20 the first aid course to become more relevant to the mining context including the psychological  
21 aspects needs to be further explored.

22  
23  
24 Present results show that mineworkers who had experience in using self-protective and first  
25 aid equipment, e.g. self-contained self-rescuers (50%), bandages (52%) or defibrillators  
26 (44%), also considered themselves to be more prepared to respond during emergencies with  
27 injuries. It has been shown that hands-on training with first aid equipment improved lay  
28 person skills.<sup>35</sup> Other authors have recommended that the mineworkers practice using their  
29 self-contained self-rescuers because, on several occasions, mineworkers have claimed that  
30  
31  
32  
33  
34  
35  
36  
37  
38  
39  
40  
41  
42  
43  
44  
45  
46  
47  
48  
49  
50  
51  
52  
53  
54  
55  
56  
57  
58  
59  
60



1  
2  
3 their equipment did not work in a real emergency.<sup>2</sup> The equipment used during emergencies  
4  
5 needs to be easy to use even in highly stressful situations.<sup>5</sup> To increase the preparedness of the  
6  
7 Swedish mineworkers, the regulation require annual evacuation training<sup>14</sup> which preferably  
8  
9 may include use of self-protective and first aid equipment.  
10

11  
12 The present study identified three important factors for preparedness. These factors may be  
13  
14 considered to be implemented in first aid courses. The mine companies have, according to the  
15  
16 law, great responsibility to train their personnel for emergency scenarios and the personnel  
17  
18 need to practice realistic and relevant scenarios during both table-top and practical exercises.  
19  
20 This may improve confidence in how to act in case of emergencies with injuries.  
21  
22  
23

## 24 25 CONCLUSIONS

26  
27 Although the companies continuously work on incident prevention, emergencies with injuries  
28  
29 still occur. Therefore, a systematic focus on peer first response is necessary to deliver aid  
30  
31 within a limited timeframe. It might be necessary to review and revise the content of the first  
32  
33 aid courses to better adapt them to a mining context, as well as including both theoretical and  
34  
35 practical elements. Therefore, a program approach focusing on peer first response with well-  
36  
37 structured and systematic table-top exercises, followed by well-defined skills training  
38  
39 exercises, and finally full-scale realistic scenario trainings including all different rescue  
40  
41 organizations might have the potential to mitigate the consequences of emergencies with  
42  
43 injuries.  
44  
45  
46  
47  
48  
49  
50

51 **Acknowledgements:** The authors would like to express gratitude to the mining companies  
52  
53 and workers that have been involved in the research and especially those who helped develop  
54  
55 the questionnaire. Furthermore, the authors are gracious to Dr Johan Svensson at the Umeå  
56  
57 School of Business, Economics and Statistics for expert help with data analysis.  
58  
59  
60

1  
2  
3 **Contributors:** The study was initiated, conceptualized and supervised by BIS, UB, LG and  
4  
5 SK. SK collected and analysed the data as well as drafted the manuscript. The manuscript was  
6  
7 reviewed and revised by SK, BIS, UB, MH and LG. All authors read and approved the final  
8  
9 manuscript.  
10

11  
12 **Funding:** This work was supported by the Swedish National Board of Health and Welfare  
13  
14 and the European Regional Development Fund, under the project Safety & Security Test  
15  
16 Arena.  
17

18  
19  
20 **Competing interests:** None declared  
21

22 **Patient consent for publication:** Not applicable  
23

24 **Patient and public involvement:** Neither patients nor the public were included in the design,  
25  
26 or conduct, or reporting, or dissemination plans of the research.  
27

28  
29 **Ethical considerations:** The study has been performed in accordance with the Helsinki  
30  
31 declaration.<sup>36</sup> The subject area and methods of this study are excluded from ethical wetting  
32  
33 according to the Swedish Act concerning the Ethical Review of Research Involving Humans  
34  
35 (SFS 2003:460)<sup>37</sup> and therefore no ethical permission has been sought. Measures have been  
36  
37 taken to protect the anonymity and free will of the participants. The participating mines were  
38  
39 sent paper questionnaires and information letters. The information letters informed the  
40  
41 participants about the study and that it was completely voluntary to participate. They were  
42  
43 also informed that the results were to be presented at the group level and no one would be  
44  
45 able to identify individual answers. Although the participants were encouraged to answer all  
46  
47 questions, they were free to hand in a blank questionnaire or only partly answer the  
48  
49 questionnaire. No sensitive personal information was collected. The participants gave their  
50  
51 informed consent by anonymously answering the questionnaires. The participants were  
52  
53 completely anonymized to the researchers as the data collection method made it impossible to  
54  
55 create code-lists.  
56  
57  
58  
59  
60

**Data availability statement:** All data relevant to the study are included in the article.

## REFERENCES

1. Bealko SB, Alexander DW, Chasko LL, et al. Mine rescue training facility inventory - compendium of ideas to improve US coal mine rescue training: The National Institute for Occupational Safety and Health (NIOSH), Transactions of the Society for Mining, Metallurgy, and Exploration, Inc, TP-09-035, 2011:517-24.
2. Kowalski-Trakofler KM, Vaught C, Brnich MJ, Jr. Expectations Training for Miners Using Self-Contained Self-Rescuers in Escapes from Underground Coal Mines. *Journal of Occupational and Environmental Hygiene* 2008;5(10):671-7. doi: 10.1080/15459620802333632
3. Engström KG, Angrén J, Björnstig U, et al. Mass-Casualty Incidents in the Underground Mining Industry: Applying the Haddon Matrix on an Integrative Literature Review. *Disaster Medicine and Public Health Preparedness*, 2018;12(1):138-46. doi: <https://doi.org/10.1017/dmp.2017.31>
4. Lehnen F, Martens PN, Rattman L. Evaluation of European mine rescue and its need for internationalization. Fourth International Symposium Mineral Resources and Mine Development: 22-23 May 2013. Aachen International Mining Symposia: RWTH Aachen University, Germany, 2013:175-86.
5. Brake R. An integrated strategy for emergency egress from an underground metal mine. Proceedings in the 8th US Mine Ventilation congress. University of Missouri, Missouri, 1999:649-57
6. Conti RS. Responders to underground mine fires. Proceedings in the Thirty-Second Annual Conference of the Institute on Mining Health, Safety and Research. Salt Lake City, UT, 2001.
7. Helsloot I, Ruitenberg A. Citizen Response to Disasters: a Survey of Literature and Some Practical Implications. *Journal of Contingencies and crisis management* 2004;12(3):98-111. doi: <https://doi.org/10.1111/j.0966-0879.2004.00440.x>
8. Whittaker J, McLennan B, Handmer J. A review of informal volunteerism in emergencies and disasters: Definition, opportunities and challenges. *International Journal of Disaster Risk Reduction* 2015;13:358-68. doi: 10.1016/j.ijdr.2015.07.010
9. Xiao T, Horberry T, Cliff D. Analysing mine emergency management needs: a cognitive work analysis approach. *International Journal of Emergency Management*, 2015;11(3):191-208.
10. Mine Safety Technology and Training Commission. Improving mine safety technology and training: establishing U.S. global leadership. Washington D.C.: National Mining Association, 2006.
11. Kitch C. Mourning “Men Joined in Peril and Purpose”: Working-Class Heroism in News Repair of the Sago Miners’ Story. *Critical Studies in Media Communication* 2007;24(2):115-31. doi: 10.1080/07393180701262727
12. Kowalski-Trakofler KM, Vaught C. Psycho-Social Issues in Mine Emergencies: The Impact on the Individual, the Organization and the Community. *Minerals* 2012;2(2):129-68. doi: 10.3390/min2020129

13. Kowalski-Trakofler KM, Vaught C, Scharf, T. Judgement and decision making under stress: an overview for emergency managers. *International Journal of Emergency Management*, 2003;1(3):278-89. doi: 10.1504/IJEM.2003.003297
14. Swedish Work Environment Authority. Mountain and mining quarrying: Swedish Work Environment Authority's legislation about mountain and mining quarrying and also general advice about the application of the legislation [In Swedish: Berg- och gruvarbete: Arbetsmiljöverkets föreskrifter om berg- och gruvarbete samt allmänna råd om tillämpningen av föreskrifterna]. Swedish Work Environment Authority, Stockholm, 2010.
15. Conti RS, Chasko LL, Wiehagen WJ, et al. Fire response preparedness for underground mines. Pittsburgh, PA: Centers for Disease Control and Prevention, National Institute for Occupational Safety and Health, 2005.
16. Mishra S, Suar D. Do Lessons People Learn Determine Disaster Cognition and Preparedness? *Psychology and Developing Societies* 2007;19(2):143-59. doi: 10.1177/097133360701900201
17. Slepski LA. Emergency Preparedness: Concept Development for Nursing Practice. *Nursing Clinics of North America* 2005;40(3):419-30, vii. doi: 10.1016/j.cnur.2005.04.011
18. Dong Y, Peng CYJ. Principled missing data methods for researchers. *Springer Plus*, 2013;2(222):1-17. doi: <https://doi.org/10.1186/2193-1801-2-222>
19. IBM SPSS Statistics for Windows, Version 24.0. [program]. Armonk, NY: IBM Corp., 2016.
20. Stata Statistical Software: Release 14. [program]. College Station, TX: StataCorp LP., 2015.
21. Costello AB, Osborne JW, . Best Practices in Exploratory Factor Analysis: Four Recommendations for Getting the Most from Your Analysis. *Practical Assessment, Research & Evaluation*, 2005;10(7):1-9.
22. StataCorp. Stata base reference manual - Release 14. College Station, Texas, USA: StataCorp LP., 2015.
23. Heard CL, Pearce JM, Rogers MB. Mapping the public first-aid training landscape: uptake, knowledge confidence and willingness to deliver first aid in disasters/emergencies – a scoping review. *Disasters* 2019 doi: 10.1111/disa.12374.
24. Ross EM, Redman TT, Mapp JG, et al. Stop the Bleed: The Effect of Hemorrhage Control Education on Laypersons' Willingness to Respond During a Traumatic Medical Emergency. *Prehospital Disaster Medicine* 2018;33(2):127-32. doi: 10.1017/S1049023X18000055
25. Riegel B, Mosesso VN, Birnbaum A, et al. Stress reactions and perceived difficulties of lay responders to a medical emergency. *Resuscitation* 2006;70(1):98-106. doi: 10.1016/j.resuscitation.2005.10.029
26. Cole HP, Vaught C, Wiehagen WJ, et al. Decision Making During a Simulated Mine Fire Escape. *IEEE TRANSACTIONS ON ENGINEERING MANAGEMENT* 1998;45(2):153-62. doi: 10.1109/17.669762.
27. Brnich MJ, Jr., Hall EE. Incorporating Judgment and Decisionmaking into Quarterly Mine Escape Training Based on a Mine Fire Scenario. Pittsburgh, PA: U.S.: Department of

- 1  
2  
3 Health and Human Services, Centers for Disease Control and Prevention, National  
4 Institute for Occupational Safety and Health, NIOSH, 2013.  
5
- 6 28. Haas EJ, Hoebbel CL, Rost KA. An Analysis of Trainers' Perspectives within an  
7 Ecological Framework: Factors that Influence Mine Safety Training Processes. *Safety*  
8 *and Health at Work* 2014;5(3):118-24. doi: 10.1016/j.shaw.2014.06.004  
9
- 10 29. Cliff D, Grieves J. Improving emergency management in underground coal mines. In  
11 Aziz, N (ed), 10th Underground Coal Operators' Conference 11-12 February 2010.  
12 University of Wollongong and the Australasian Institute of Mining and Metallurgy,  
13 2010:281-87.  
14
- 15 30. Lingard H. The effect of first aid training on Australian construction workers'  
16 occupational health and safety motivation and risk control behavior. *Journal of Safety*  
17 *Research* 2002;33(2):209-30. doi: [https://doi.org/10.1016/S0022-4375\(02\)00013-0](https://doi.org/10.1016/S0022-4375(02)00013-0)  
18
- 19 31. Schouten R, Callahan MV, Bryant S. Community Response to Disaster: The Role of the  
20 Workplace. *Harvard Review of Psychiatry* 2004;12(4):229-37. doi:  
21 10.1080/10673220490509624  
22
- 23 32. Passmore D, Bennett J, Radomsky M, et al. Tailored Safety Training for Miners in Small  
24 Pennsylvania Surface Coal Mines. *American Journal of Public Health*,  
25 1990;80(9):1134-35.  
26
- 27 33. Karlsson S, Gyllencreutz L, Engström G, et al. Preparedness for mining injury incidents -  
28 Interviews with Swedish rescuers. *Safety Science Monitor* 2017;20(1):1-10  
29
- 30 34. Axelsson Å, Herlitz J, Fridlund B. How bystanders perceive their cardiopulmonary  
31 resuscitation intervention: a qualitative study. *Resuscitation* 2000;47(1):71-81. doi:  
32 10.1016/s0300-9572(00)00209-4  
33
- 34 35. Goralnick E, Chaudhary MA, McCarty JC, et al. Effectiveness of Instructional  
35 Interventions for Hemorrhage Control Readiness for Laypersons in the Public Access  
36 and Tourniquet Training Study (PATTS) – A Randomized Clinical Trial. *JAMA*  
37 *Surgery*, 2018;153(9):791-99. doi: 10.1001/jamasurg.2018.1099  
38
- 39 36. World Medical Association. World Medical Association declaration of Helsinki - Ethical  
40 principles for medical research involving human subjects, 2013. Available at:  
41 [https://www.wma.net/policies-post/wma-declaration-of-helsinki-ethical-principles-for-](https://www.wma.net/policies-post/wma-declaration-of-helsinki-ethical-principles-for-medical-research-involving-human-subjects/)  
42 [medical-research-involving-human-subjects/](https://www.wma.net/policies-post/wma-declaration-of-helsinki-ethical-principles-for-medical-research-involving-human-subjects/) (accessed September 16, 2019)  
43
- 44 37. The Swedish Parliament. The Act concerning the Ethical Review of Research Involving  
45 Humans [In Swedish: Lag (2003:460) om etikprövning av forskning som avser  
46 människor]. The Swedish Parliament, 2003.  
47  
48  
49  
50  
51  
52  
53  
54  
55  
56  
57  
58  
59  
60

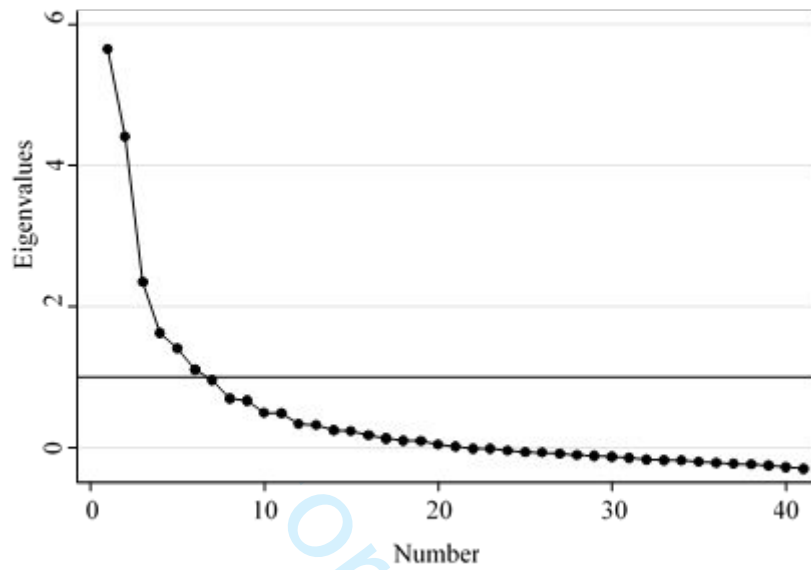

Figure 1 Scree plot of the eigenvalues as a rationale for the choice to use three factors in the analysis

Table 1. Characteristics of the mineworkers in the study

| Variable                                               | Respondents n=741  |
|--------------------------------------------------------|--------------------|
| Sex                                                    |                    |
| Female                                                 | 77 (10%)           |
| Male                                                   | 658 (89%)          |
| Not reported                                           | 6 (1%)             |
| Age (years)                                            | Mean 40.4, SD 11.7 |
| Work experience (years)                                | Mean 11.9, SD 10.9 |
| Mineworker occupation*                                 |                    |
| Miner-labourers                                        | 285 (39%)          |
| Maintenance-technical staff                            | 399 (54%)          |
| Supervisors-managers                                   | 55 (7%)            |
| Not reported                                           | 2 (0%)             |
| Extra rescue guide/medical training and responsibility |                    |
| Yes                                                    | 86 (12%)           |
| No                                                     | 595 (80%)          |
| Not reported                                           | 60 (8%)            |

\* Mineworkers consist of miner-labourers, maintenance-technical staff and supervisors-managers. Miner-labourers work with mineral processing. Maintenance-technical staff comprises, for example, electricians and machine operators. Supervisors-managers include all forms of supervisors and managers who work underground (c.f. Cole et al., 1998)

Table 2 Questions and responses (n=741)\*

| Questions |                                                                                                                                                                                                              | Frequencies n(%)                                                 |                                                                   |             |                                                                                                 |                   |
|-----------|--------------------------------------------------------------------------------------------------------------------------------------------------------------------------------------------------------------|------------------------------------------------------------------|-------------------------------------------------------------------|-------------|-------------------------------------------------------------------------------------------------|-------------------|
|           |                                                                                                                                                                                                              | a) Have you used self-protective and first aid equipment before? | b) Do you have access to self-protective and first aid equipment? |             | c) Do you consider yourself as being comfortable using self-protective and first aid equipment? |                   |
| Q1        |                                                                                                                                                                                                              | Yes                                                              | Yes                                                               | Yes         |                                                                                                 |                   |
|           | Stretcher                                                                                                                                                                                                    | 177 (24%)                                                        | 501 (68%)                                                         | 406 (55%)   |                                                                                                 |                   |
|           | Bandages                                                                                                                                                                                                     | 385 (52%)                                                        | 670 (90%)                                                         | 553 (75%)   |                                                                                                 |                   |
|           | Splints                                                                                                                                                                                                      | 115 (16%)                                                        | 233 (32%)                                                         | 188 (25%)   |                                                                                                 |                   |
|           | Eye-rinse                                                                                                                                                                                                    | 520 (70%)                                                        | 705 (95%)                                                         | 683 (92%)   |                                                                                                 |                   |
|           | Defibrillator                                                                                                                                                                                                | 328 (44%)                                                        | 627 (85%)                                                         | 443 (60%)   |                                                                                                 |                   |
|           | Self-contained self-rescuer ( SCSR)                                                                                                                                                                          | 371 (50%)                                                        | 716 (97%)                                                         | 624 (84%)   |                                                                                                 |                   |
|           | Fire extinguisher                                                                                                                                                                                            | 542 (73%)                                                        | 724 (98%)                                                         | 703 (95%)   |                                                                                                 |                   |
|           |                                                                                                                                                                                                              | A very high extent                                               | A high extent                                                     | Some extent | A low extent                                                                                    | A very low extent |
| Q2        | To what extent do you consider there is a risk of being injured at your workplace?                                                                                                                           | 55 (8%)                                                          | 166 (22%)                                                         | 378 (51%)   | 115 (16%)                                                                                       | 25 (3%)           |
| Q3        | Imagine that your peer has sustained a moderate or more severe injury, e.g. crush injury, severe bleeding or has a fracture. To what extent do you consider yourself knowledgeable enough to help your peer? | 43 (6%)                                                          | 157 (21%)                                                         | 448 (60%)   | 84 (11%)                                                                                        | 4 (1%)            |
| Q4        | Imagine you are working as usual underground. Suddenly you witness the following situations at the incident site. To what extent would you know how to act?                                                  |                                                                  |                                                                   |             |                                                                                                 |                   |
| a)        | If there is a rock-fall and my peers are trapped.                                                                                                                                                            | 28 (4%)                                                          | 170 (23%)                                                         | 388 (52%)   | 126 (17%)                                                                                       | 28 (4%)           |



|    |    |                                                                                                                                                                                                                                         |          |           |           |           |           |
|----|----|-----------------------------------------------------------------------------------------------------------------------------------------------------------------------------------------------------------------------------------------|----------|-----------|-----------|-----------|-----------|
| 1  |    |                                                                                                                                                                                                                                         |          |           |           |           |           |
| 2  |    |                                                                                                                                                                                                                                         |          |           |           |           |           |
| 3  | b) | If a vehicle crashes and the driver is moderately or more seriously injured.                                                                                                                                                            | 36 (5%)  | 207 (28%) | 420 (57%) | 64 (9%)   | 12 (1%)   |
| 4  |    |                                                                                                                                                                                                                                         |          |           |           |           |           |
| 5  | c) | If smoke/gas develops in the vicinity of where I am working and my peer becomes unconscious.                                                                                                                                            | 45 (6%)  | 177 (24%) | 412 (56%) | 86 (12%)  | 18 (2%)   |
| 6  |    |                                                                                                                                                                                                                                         |          |           |           |           |           |
| 7  |    |                                                                                                                                                                                                                                         |          |           |           |           |           |
| 8  | d) | If my peer suffers a cardiac arrest.                                                                                                                                                                                                    | 61 (8%)  | 261 (35%) | 351 (47%) | 55 (8%)   | 12 (2%)   |
| 9  | Q5 | Imagine you witness a truck that is unable to brake and therefore crashes into the mine wall. The truck catches fire and it is impossible to get past it. The driver is alive, but trapped. A lot of smoke is emanating from the truck. |          |           |           |           |           |
| 10 |    |                                                                                                                                                                                                                                         |          |           |           |           |           |
| 11 |    |                                                                                                                                                                                                                                         |          |           |           |           |           |
| 12 |    |                                                                                                                                                                                                                                         |          |           |           |           |           |
| 13 |    |                                                                                                                                                                                                                                         |          |           |           |           |           |
| 14 | a) | To what extent would you be able to reach a safe location?                                                                                                                                                                              | 78 (11%) | 291 (39%) | 334 (45%) | 17 (2%)   | 6 (1%)    |
| 15 | b) | Do you have the proper self-protective equipment?                                                                                                                                                                                       | 65 (9%)  | 327 (44%) | 319 (43%) | 11 (1%)   | 5 (1%)    |
| 16 | c) | Have you been properly trained in self-protection?                                                                                                                                                                                      | 74 (10%) | 318 (43%) | 291 (39%) | 24 (4%)   | 17 (2%)   |
| 17 |    |                                                                                                                                                                                                                                         |          |           |           |           |           |
| 18 | d) | Would you know how to act?                                                                                                                                                                                                              | 40 (5%)  | 246 (33%) | 412 (56%) | 25 (3%)   | 7 (1%)    |
| 19 | Q6 | What is the probability of the following incidents occurring?                                                                                                                                                                           |          |           |           |           |           |
| 20 |    |                                                                                                                                                                                                                                         |          |           |           |           |           |
| 21 | a) | A major vehicle incident.                                                                                                                                                                                                               | 16 (2%)  | 128 (17%) | 369 (50%) | 191 (26%) | 30 (4%)   |
| 22 | b) | A major fire incident that requires the rescue services to be contacted.                                                                                                                                                                | 26 (4%)  | 161 (22%) | 400 (54%) | 129 (17%) | 16 (2%)   |
| 23 | c) | A major explosion, involving a risk of injury.                                                                                                                                                                                          | 5 (1%)   | 21 (3%)   | 204 (27%) | 401 (54%) | 105 (14%) |
| 24 | d) | A major rock-fall, involving a risk of being crushed.                                                                                                                                                                                   | 20 (3%)  | 82 (11%)  | 375 (51%) | 218 (29%) | 40 (5%)   |
| 25 | e) | A combination of explosion, fire and rock-fall.                                                                                                                                                                                         | 8 (1%)   | 25 (3%)   | 249 (34%) | 273 (37%) | 174 (23%) |
| 26 |    |                                                                                                                                                                                                                                         |          |           |           |           |           |
| 27 | Q7 | To what extent do you think the following incidents could lead to moderate or more serious injury or death if they happened in your workplace?                                                                                          |          |           |           |           |           |
| 28 |    |                                                                                                                                                                                                                                         |          |           |           |           |           |
| 29 |    |                                                                                                                                                                                                                                         |          |           |           |           |           |
| 30 |    |                                                                                                                                                                                                                                         |          |           |           |           |           |
| 31 |    |                                                                                                                                                                                                                                         |          |           |           |           |           |
| 32 | a) | A severe vehicle incident.                                                                                                                                                                                                              | 54 (7%)  | 170 (23%) | 292 (39%) | 162 (22%) | 58 (8%)   |
| 33 | b) | A severe fire that requires the rescue services to be contacted.                                                                                                                                                                        | 32 (4%)  | 157 (21%) | 377 (51%) | 145 (20%) | 28 (4%)   |
| 34 | c) | A major rock-fall involving crushed personnel.                                                                                                                                                                                          | 51 (7%)  | 107 (14%) | 309 (42%) | 219 (30%) | 52 (7%)   |
| 35 | d) | A major explosion.                                                                                                                                                                                                                      | 44 (6%)  | 76 (10%)  | 194 (26%) | 310 (42%) | 109 (15%) |
| 36 |    |                                                                                                                                                                                                                                         |          |           |           |           |           |
| 37 |    |                                                                                                                                                                                                                                         |          |           |           |           |           |
| 38 |    |                                                                                                                                                                                                                                         |          |           |           |           |           |
| 39 |    |                                                                                                                                                                                                                                         |          |           |           |           |           |
| 40 |    |                                                                                                                                                                                                                                         |          |           |           |           |           |
| 41 |    |                                                                                                                                                                                                                                         |          |           |           |           |           |
| 42 |    |                                                                                                                                                                                                                                         |          |           |           |           |           |
| 43 |    |                                                                                                                                                                                                                                         |          |           |           |           |           |
| 44 |    |                                                                                                                                                                                                                                         |          |           |           |           |           |
| 45 |    |                                                                                                                                                                                                                                         |          |           |           |           |           |
| 46 |    |                                                                                                                                                                                                                                         |          |           |           |           |           |

Q8 To what extent do you consider the mine you work in is prepared for an underground incident involving multiple injured parties? 42 (6%) 249 (33%) 347 (47%) 83 (11%) 12 (2%)

\*Not reported 0-9% in all questions

For peer review only

1  
2  
3  
4  
5  
6  
7  
8  
9  
10  
11  
12  
13  
14  
15  
16  
17  
18  
19  
20  
21  
22  
23  
24  
25  
26  
27  
28  
29  
30  
31  
32  
33  
34  
35  
36  
37  
38  
39  
40  
41  
42  
43  
44  
45  
46

Table 3: Loadings of the questions to the three factors and the unexplained variance

| Variable               | Factor 1    | Factor 2    | Factor 3    | Uniqueness |
|------------------------|-------------|-------------|-------------|------------|
| Q 1a stretcher         | 0.08        | 0.00        | <b>0.56</b> | 0.65       |
| Q 1b stretcher         | 0.19        | -0.11       | 0.19        | 0.89       |
| Q 1c stretcher         | 0.36        | -0.11       | 0.19        | 0.77       |
| Q 1a bandages          | 0.02        | -0.00       | <b>0.62</b> | 0.61       |
| Q 1b bandages          | 0.22        | -0.12       | 0.15        | 0.89       |
| Q 1c bandages          | 0.40        | -0.08       | 0.11        | 0.78       |
| Q 1a splints           | 0.10        | -0.02       | <b>0.57</b> | 0.62       |
| Q 1b splints           | 0.24        | -0.09       | 0.20        | 0.86       |
| Q 1c splints           | 0.38        | -0.04       | 0.20        | 0.76       |
| Q 1a eye rinse         | -0.08       | 0.10        | <b>0.54</b> | 0.72       |
| Q 1b eye rinse         | 0.12        | -0.03       | 0.09        | 0.97       |
| Q 1c eye rinse         | 0.26        | -0.04       | 0.09        | 0.90       |
| Q 1a defibrillator     | -0.11       | -0.01       | <b>0.68</b> | 0.57       |
| Q 1b defibrillator     | 0.13        | -0.03       | 0.15        | 0.95       |
| Q 1c defibrillator     | 0.32        | -0.07       | 0.19        | 0.81       |
| Q 1a SCSR              | -0.07       | 0.03        | <b>0.65</b> | 0.61       |
| Q 1b SCSR              | 0.10        | -0.13       | 0.02        | 0.97       |
| Q 1c SCSR              | 0.32        | -0.12       | -0.00       | 0.87       |
| Q 1a fire extinguisher | -0.16       | 0.06        | <b>0.62</b> | 0.64       |
| Q 1b fire extinguisher | 0.19        | -0.12       | 0.01        | 0.94       |
| Q 1c fire extinguisher | 0.22        | -0.09       | 0.02        | 0.93       |
| Q 2                    | -0.00       | <b>0.54</b> | -0.03       | 0.70       |
| Q 3                    | <b>0.65</b> | 0.07        | 0.09        | 0.54       |
| Q 4a                   | <b>0.60</b> | 0.10        | 0.03        | 0.64       |
| Q 4b                   | <b>0.75</b> | 0.11        | 0.04        | 0.44       |
| Q 4c                   | <b>0.70</b> | 0.12        | -0.02       | 0.54       |
| Q 4d                   | <b>0.62</b> | 0.04        | 0.04        | 0.60       |
| Q 5a                   | <b>0.60</b> | 0.03        | -0.20       | 0.69       |
| Q 5b                   | <b>0.62</b> | -0.03       | -0.24       | 0.65       |
| Q 5c                   | <b>0.60</b> | -0.00       | -0.13       | 0.67       |
| Q 5d                   | <b>0.75</b> | 0.04        | -0.12       | 0.49       |
| Q 6a                   | 0.07        | <b>0.61</b> | 0.04        | 0.64       |
| Q 6b                   | 0.09        | <b>0.71</b> | 0.00        | 0.51       |
| Q 6c                   | -0.03       | <b>0.60</b> | 0.13        | 0.61       |
| Q 6d                   | -0.00       | <b>0.71</b> | 0.04        | 0.49       |
| Q 6e                   | -0.00       | <b>0.64</b> | 0.12        | 0.57       |
| Q 7a                   | 0.11        | <b>0.63</b> | 0.01        | 0.62       |
| Q 7b                   | 0.07        | <b>0.75</b> | -0.03       | 0.46       |
| Q 7c                   | 0.10        | <b>0.75</b> | -0.08       | 0.46       |
| Q 7d                   | 0.08        | <b>0.58</b> | -0.02       | 0.68       |
| Q 8                    | 0.32        | -0.05       | -0.11       | 0.90       |

**Note:** Loadings (>0.5) highlighted in bold indicate the factor on which the item was placed.

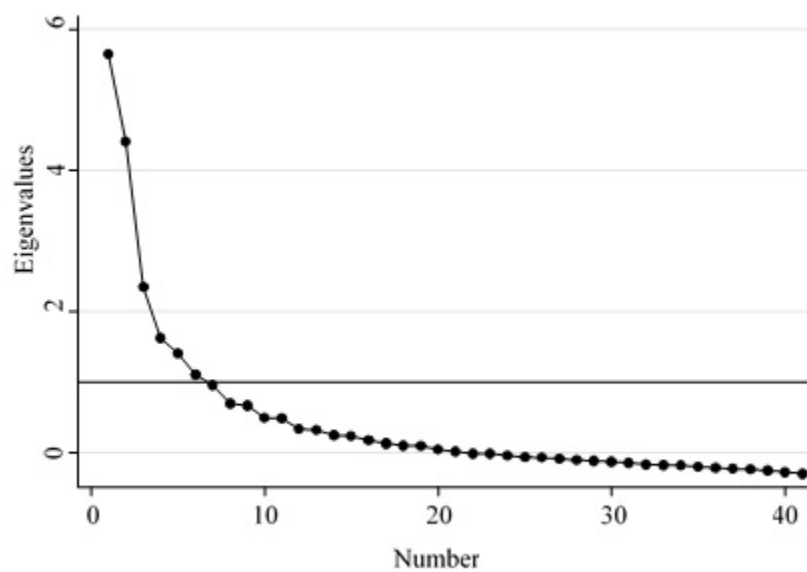

Scree plot of the eigenvalues as a rationale for the choice to use three factors in the analysis

113x84mm (96 x 96 DPI)

# BMJ Open

## Preparedness for peer first response to mining emergencies resulting in injuries: a cross-sectional study

|                                 |                                                                                                                                                                                                                                                                                                                                                                                                                                                                                                                                                                                                                                                           |
|---------------------------------|-----------------------------------------------------------------------------------------------------------------------------------------------------------------------------------------------------------------------------------------------------------------------------------------------------------------------------------------------------------------------------------------------------------------------------------------------------------------------------------------------------------------------------------------------------------------------------------------------------------------------------------------------------------|
| Journal:                        | <i>BMJ Open</i>                                                                                                                                                                                                                                                                                                                                                                                                                                                                                                                                                                                                                                           |
| Manuscript ID                   | bmjopen-2019-036094.R1                                                                                                                                                                                                                                                                                                                                                                                                                                                                                                                                                                                                                                    |
| Article Type:                   | Original research                                                                                                                                                                                                                                                                                                                                                                                                                                                                                                                                                                                                                                         |
| Date Submitted by the Author:   | 03-Aug-2020                                                                                                                                                                                                                                                                                                                                                                                                                                                                                                                                                                                                                                               |
| Complete List of Authors:       | Karlsson, Sofia; Umeå Universitet Medicinska fakulteten, Department of Surgical and Perioperative Sciences, Surgery<br>Saveman, Britt-Inger; Umeå Universitet Medicinska fakulteten, Department of Surgical and Perioperative Sciences, Surgery<br>Hultin, Magnus; Umeå Universitet Medicinska fakulteten, Department of Surgical and Perioperative Sciences, Anaesthesiology and Intensive Care Medicine<br>Björnstig, Ulf; Umeå Universitet Medicinska fakulteten, Department of Surgical and Perioperative Sciences, Surgery<br>Gyllencreutz, Lina; Umeå Universitet Medicinska fakulteten, Department of Surgical and Perioperative Sciences, Surgery |
| <b>Primary Subject Heading</b>: | Emergency medicine                                                                                                                                                                                                                                                                                                                                                                                                                                                                                                                                                                                                                                        |
| Secondary Subject Heading:      | Occupational and environmental medicine, Medical education and training                                                                                                                                                                                                                                                                                                                                                                                                                                                                                                                                                                                   |
| Keywords:                       | Trauma management < ORTHOPAEDIC & TRAUMA SURGERY, MEDICAL EDUCATION & TRAINING, ACCIDENT & EMERGENCY MEDICINE, OCCUPATIONAL & INDUSTRIAL MEDICINE                                                                                                                                                                                                                                                                                                                                                                                                                                                                                                         |
|                                 |                                                                                                                                                                                                                                                                                                                                                                                                                                                                                                                                                                                                                                                           |

SCHOLARONE™  
Manuscripts

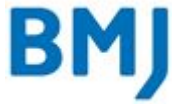

I, the Submitting Author has the right to grant and does grant on behalf of all authors of the Work (as defined in the below author licence), an exclusive licence and/or a non-exclusive licence for contributions from authors who are: i) UK Crown employees; ii) where BMJ has agreed a CC-BY licence shall apply, and/or iii) in accordance with the terms applicable for US Federal Government officers or employees acting as part of their official duties; on a worldwide, perpetual, irrevocable, royalty-free basis to BMJ Publishing Group Ltd ("BMJ") its licensees and where the relevant Journal is co-owned by BMJ to the co-owners of the Journal, to publish the Work in this journal and any other BMJ products and to exploit all rights, as set out in our [licence](#).

The Submitting Author accepts and understands that any supply made under these terms is made by BMJ to the Submitting Author unless you are acting as an employee on behalf of your employer or a postgraduate student of an affiliated institution which is paying any applicable article publishing charge ("APC") for Open Access articles. Where the Submitting Author wishes to make the Work available on an Open Access basis (and intends to pay the relevant APC), the terms of reuse of such Open Access shall be governed by a Creative Commons licence – details of these licences and which [Creative Commons](#) licence will apply to this Work are set out in our licence referred to above.

Other than as permitted in any relevant BMJ Author's Self Archiving Policies, I confirm this Work has not been accepted for publication elsewhere, is not being considered for publication elsewhere and does not duplicate material already published. I confirm all authors consent to publication of this Work and authorise the granting of this licence.

## Preparedness for peer first response to mining emergencies resulting in injuries: a cross-sectional study

Sofia Karlsson<sup>1</sup>, Britt-Inger Saveman<sup>1</sup>, Magnus Hultin<sup>2\*</sup>, Ulf Björnstig<sup>1</sup>, Lina Gyllencreutz<sup>1</sup>

1. Department of Surgical and Perioperative Sciences, Surgery, Umeå University, Umeå, Sweden.

2. Department of Surgical and Perioperative Sciences, Anesthesiology and Critical Care Medicine, Umeå University, Umeå, Sweden.

\*Correspondence to: Magnus Hultin, [magnus.hultin@umu.se](mailto:magnus.hultin@umu.se)

ORCID:

Sofia Karlsson, <https://orcid.org/0000-0002-8665-9302>

Britt-Inger Saveman, <https://orcid.org/0000-0003-3716-6445>

Magnus Hultin, [orcid.org/0000-0003-2935-7161](https://orcid.org/0000-0003-2935-7161)

Lina Gyllencreutz: <https://orcid.org/0000-0002-1848-060X>

**Word count: 4110**

**Number of figures: 2**

**Number of tables: 2**

## ABSTRACT

**Objective:** Identify factors of preparedness for peer first response to underground mining emergencies with injured victims.

**Design:** Cross-sectional questionnaire study of Swedish underground mineworkers.

**Setting:** Seven out of nine Swedish underground mines.

**Participants:** A total of 741 mineworkers out of 1022 (73%) participated in this study.

**Interventions:** None.

**Outcome measures:** Level of preparedness for emergencies with injuries in underground mines.

**Results:** Three factors influenced the preparedness of mineworkers for a peer first response:

1) familiarity with rescue procedures during emergencies with injuries; 2) risk perception of emergencies with injuries; and 3) experience of using self-protective and first aid equipment.

Mineworkers who believed that they knew how to handle emergencies with injuries (odds ratio [OR] 1.30, 95% confidence interval [CI] 1.22–1.38) and those who were trained in the use of self-protective and first aid equipment (OR 1.19, 95% CI 1.07–1.32) considered themselves to be better prepared for a peer first response than those who were unfamiliar with the rescue procedures or who had not used self-protective and first aid equipment. However, mineworkers who rated the risk for emergencies with injuries as high considered themselves to be less prepared than those who rated the risk as low (OR 0.95, 95% CI 0.91–0.98).

**Conclusion:** This study identified three factors that were important for the peer-support preparedness of underground mineworkers. More research is needed to adapt and contextualise first aid courses to the needs of underground peer responders.

### Strengths and limitations of this study

- The study had a high response rate (73%) and included participants from seven out of nine underground mines in Sweden.



- Exploratory factor analysis and multiple logistic regression analysis facilitated the identification of key factors associated with emergency medical preparedness.
- Post-estimation tests of the multiple logistic regression model indicated a goodness of fit.
- The questionnaire was evaluated with a face validity test among experienced mineworkers, whereas a comprehensive pilot study may have improved the questionnaire, as would a test/retest or random response test.
- This study is based on data from the mineworkers' self-assessed level of preparedness; other methods, including knowledge test or observation of full-scale practical exercises, could have generated more objective responses.

**Keywords:** Trauma management, Medical education & training, Accident & Emergency medicine, Occupational and Industrial medicine.

## INTRODUCTION

Mining emergencies are infrequent occurrences but may result in severe consequences, such as the injury or death of mineworkers.[1, 2] Thus, mining emergencies require an efficient and timely response.[3] According to an international literature review [4], most of the literature relates to incidents in coal mines. The organic nature of coal has a different set of risks than metalliferous mines.[4] Thus, studying the Swedish setting, with its mineral and metalliferous underground mines, can contribute to the knowledge base of the scientific literature. The commonest emergencies in mineral and metalliferous underground mines are fires, vehicular incidents, and rock-falls.[4] A major underground fire, for example, can lead to partially or temporarily sealed off areas, which means that mineworkers might have to self-evacuate or be rescued.[5] Fires can influence the roof stability as well as generate toxic gases and create oxygen-depleted environments in large sections of the mine.[2] This makes both self-initiated escape and rescue operations difficult.[6] Mine rescue operations take time, regardless of whether the company's own mine rescue teams, as in most European countries, or the local rescue services and Emergency Medical Service (EMS), which is common in Sweden, undertake the rescue operations.[7, 8] Swedish mines are required to either train their own mine rescue service or have mine guides to assist the local rescue service during rescue operations.[9] Nonetheless, there is a delay as the rescue teams have to reach the remote mine [8], plan the rescue operation and navigate a complex environment to reach the incident site, which could be far underground.[10, 11]

Because time-consuming rescue operations can be fatal for severely injured victims[12], mineworkers in the vicinity of the injured need to act as immediate responders and care for their injured peers until professional help arrives.[13] Immediate responders must have essential knowledge, skills, and equipment [14] in order to care for their injured peers.

1  
2  
3 The combination of being a peer to the victim and being unskilled at handling injuries may  
4  
5 lead to emotional distress that might impede their actions.[15]  
6  
7

8 To escape or be rescued during emergencies, the Mine Safety Technology and  
9  
10 Training Commission[11] recommends that mineworkers should be trained in three key areas:  
11  
12 (i) knowledge of escape/rescue technologies, (ii) mine-specific knowledge in order to find  
13  
14 evacuation routes, and (iii) escape/rescue conceptual knowledge to facilitate difficult decision  
15  
16 making in an emergency situation. A lack of knowledge of mineworkers in these areas may  
17  
18 have fatal consequences. For example, in the Sago mine explosion in 2006,[16] 12  
19  
20 mineworkers died, and they lacked knowledge of how to use self-contained self-rescuers.[17]  
21  
22  
23

24 Swedish mining companies aim to prevent and mitigate incidents by focussing  
25  
26 on risk management, evacuation technology, and escape routes.[18] Moreover, the companies  
27  
28 acknowledge the need for preparedness of their personnel for incidents and implement work-  
29  
30 safety regulations, including those for first aid and psychological and social support after  
31  
32 emergencies.[19] These regulations are defined based on the type and risks of the workplace,  
33  
34 and a sufficient number of workers need to be prepared to provide first aid, with adequate  
35  
36 knowledge of and access to the relevant equipment needed for first aid.[19] Thus,  
37  
38 preparedness to respond to incidents is an essential element of any underground mine's  
39  
40 strategic plan.[20] However, there are few studies in the literature on the medical aspects and  
41  
42 peer first response in mining emergencies with injuries.[4] By studying the preparedness of  
43  
44 Swedish mineworkers for emergencies with injuries, the complementing factors in the above-  
45  
46 described three key areas can be identified.  
47  
48  
49  
50

51 Thus, this study aimed to identify factors of preparedness for peer first response  
52  
53 to underground mining emergencies with injured victims. A secondary objective was to  
54  
55 describe the preparedness of Swedish mineworkers, which is the data the factors are identified  
56  
57 from.  
58  
59  
60

## METHODS

### Design

This study was a national cross-sectional questionnaire survey.

### Sample

Questionnaires (n=1,022) were distributed to seven participating mines between November 2016 and February 2017. The response rate was 73% (n=741) after excluding 29 individuals who were not working underground and 11 individuals with missing data for more than one fourth of the study variables. Table 1 presents the details of the participant characteristics.

**Table 1.** Characteristics of the mineworkers included in this study

| Variables                                              | Respondents n=741  |
|--------------------------------------------------------|--------------------|
| Sex                                                    |                    |
| Female                                                 | 77 (10%)           |
| Male                                                   | 658 (89%)          |
| Not reported                                           | 6 (1%)             |
| Age (years)                                            | Mean 40.4, SD 11.7 |
| Work experience (years)                                | Mean 11.9, SD 10.9 |
| Mineworker occupation*                                 |                    |
| Miner-labourers                                        | 285 (38%)          |
| Maintenance-technical staff                            | 399 (54%)          |
| Supervisors-managers                                   | 55 (7%)            |
| Not reported                                           | 2 (0%)             |
| Extra rescue guide/medical training and responsibility |                    |
| Yes                                                    | 86 (12%)           |
| No                                                     | 595 (80%)          |
| Not reported                                           | 60 (8%)            |

\* Mineworkers comprise miner-laborers, maintenance-technical staff, and supervisor-managers. Miner-laborers work with mineral processing. The maintenance-technical staff include electricians and machine operators. Supervisors–managers include all forms of supervisors and managers who work underground.[21] SD=standard deviation.

### Questionnaire

The study-specific questionnaire in Swedish was specifically designed and constructed based on a review of preparedness literature and covered three areas: current mining preparedness

1  
2  
3 literature, likely scenarios in Swedish mines, and Swedish regulations. Preparedness for  
4 emergencies includes the inclusion of mineworkers with the relevant skills and ability to  
5 undertake the necessary actions.[11, 22] Relevant emergency scenarios in mineral and  
6 metalliferous mines include fires, vehicular incidents and rock-falls [4]; therefore, we  
7 focussed on these scenarios in the questionnaire. Swedish workplace regulations stipulate that  
8 the workplace risks determine the number of employees that should be educated in first aid  
9 and the availability of appropriate first aid equipment,[19] such as stretchers, bandages, and  
10 fire extinguishers.[9, 23]

21 The questionnaire was designed to capture data on the preparedness of the  
22 mineworkers as immediate responders of moderately or more severely injured peers (e.g.,  
23 fractures, concussion or more severe injuries) until they were rescued during emergencies.  
24 Thus, the questions focussed on the mineworkers' self-perceived knowledge of injuries and  
25 first aid, their first aid training and equipment, and the presumed risks of mining incidents,  
26 particularly concerning fires, vehicular incidents and rock-falls. Answers to the questions  
27 were either yes/no responses or scores rated on a five-point Likert scale. Table 2 shows the  
28 frequencies of responses of 741 mineworkers to the questions in the questionnaire before an  
29 imputation of the dataset was performed. The face validity of the questionnaire was tested on  
30 three mineworkers. The relevance and validity of the items and the questionnaire were  
31 discussed during several seminars in an iterative process by the research group.  
32  
33  
34  
35  
36  
37  
38  
39  
40  
41  
42  
43  
44  
45  
46  
47  
48  
49  
50  
51  
52  
53  
54  
55  
56  
57  
58  
59  
60

**Table 2** Questions and responses before imputation for all mineworkers (n=741)

| Questions          |                                                                                                                                                                                                                | Frequencies, n (%) |          |          |           |               |                                    |                   |                   |         |        |              |        |        |        |  |  |
|--------------------|----------------------------------------------------------------------------------------------------------------------------------------------------------------------------------------------------------------|--------------------|----------|----------|-----------|---------------|------------------------------------|-------------------|-------------------|---------|--------|--------------|--------|--------|--------|--|--|
| Global variables   | Do you consider yourself prepared to respond (before the EMS or rescue personnel arrive at the incident site) to emergencies, e.g. fire, explosions or rock-falls in the mine?                                 | Yes                |          |          | No        |               |                                    | Not reported      |                   |         |        |              |        |        |        |  |  |
|                    |                                                                                                                                                                                                                | 583 (79)           |          |          | 126 (17)  |               |                                    | 32 (4)            |                   |         |        |              |        |        |        |  |  |
| Q1                 | a) Have you used self-protective and first aid equipment before?                                                                                                                                               | Yes                |          |          | No        |               |                                    | Not reported      |                   |         |        |              |        |        |        |  |  |
|                    |                                                                                                                                                                                                                | 177 (24)           |          |          | 557 (75)  |               |                                    | 7 (1)             |                   |         |        |              |        |        |        |  |  |
|                    |                                                                                                                                                                                                                | Stretcher          | 501 (68) |          |           | 204 (28)      |                                    |                   | 36 (5)            |         |        |              |        |        |        |  |  |
|                    |                                                                                                                                                                                                                |                    | Bandages | 670 (90) |           |               | 45 (6)                             |                   |                   | 26 (4)  |        |              |        |        |        |  |  |
|                    |                                                                                                                                                                                                                |                    |          | Splints  | 233 (31)  |               |                                    | 439 (59)          |                   |         | 69 (9) |              |        |        |        |  |  |
|                    |                                                                                                                                                                                                                |                    |          |          | Eye-rinse | 705 (95)      |                                    |                   | 12 (2)            |         |        | 24 (3)       |        |        |        |  |  |
|                    |                                                                                                                                                                                                                |                    |          |          |           | Defibrillator | 627 (85)                           |                   |                   | 89 (12) |        |              | 25 (3) |        |        |  |  |
|                    |                                                                                                                                                                                                                |                    |          |          |           |               | Self-contained self-rescuer (SCSR) | 716 (97)          |                   |         | 8 (1)  |              |        | 17 (2) |        |  |  |
|                    |                                                                                                                                                                                                                |                    |          |          |           |               |                                    | Fire extinguisher | 542 (73)          |         |        | 194 (26)     |        |        | 5 (1)  |  |  |
|                    |                                                                                                                                                                                                                |                    |          |          |           |               |                                    |                   | 724 (98)          |         |        | 1 (0)        |        |        | 16 (2) |  |  |
| A very high extent |                                                                                                                                                                                                                |                    |          |          |           |               |                                    |                   | A high extent     |         |        | Some extent  |        |        |        |  |  |
| A low extent       |                                                                                                                                                                                                                |                    |          |          |           |               |                                    |                   | A very low extent |         |        | Not reported |        |        |        |  |  |
| Q2                 | To what extent do you consider that there is a risk of being injured at your workplace?                                                                                                                        | 55 (7)             |          |          |           |               |                                    |                   | 166 (22)          |         |        | 378 (51)     |        |        |        |  |  |
|                    |                                                                                                                                                                                                                | 115 (16)           |          |          |           |               |                                    |                   | 25 (3)            |         |        | 2 (0)        |        |        |        |  |  |
| Q3                 | Imagine that your peer has sustained a moderate or more severe injury (e.g., crush injury, severe bleeding or has a fracture). To what extent do you consider yourself knowledgeable enough to help your peer? | 43 (6)             |          |          | 157 (21)  |               |                                    |                   | 448 (60)          |         |        |              |        |        |        |  |  |
|                    |                                                                                                                                                                                                                | 84 (11)            |          |          | 4 (1)     |               |                                    |                   | 5 (1)             |         |        |              |        |        |        |  |  |
| Q4                 | Imagine you are working as usual underground. Suddenly, you witness the following situations at the incident site. To what extent would you know how to act?                                                   |                    |          |          |           |               |                                    |                   |                   |         |        |              |        |        |        |  |  |
|                    |                                                                                                                                                                                                                |                    |          |          |           |               |                                    |                   |                   |         |        |              |        |        |        |  |  |

|    |    |                                                                                                                                                                                                                                          |         |          |          |          |          |        |
|----|----|------------------------------------------------------------------------------------------------------------------------------------------------------------------------------------------------------------------------------------------|---------|----------|----------|----------|----------|--------|
|    | a) | If there is a rock-fall and my peers are trapped.                                                                                                                                                                                        | 28 (4)  | 170 (23) | 388 (52) | 126 (17) | 28 (4)   | 1 (0)  |
|    | b) | If a vehicle crashes and the driver is moderately or more seriously injured.                                                                                                                                                             | 36 (5)  | 207 (28) | 420 (57) | 64 (9)   | 12 (2)   | 2 (0)  |
|    | c) | If smoke/gas develops in the vicinity of where I am working, and my peer becomes unconscious.                                                                                                                                            | 45 (6)  | 177 (24) | 412 (56) | 86 (12)  | 18 (2)   | 3 (0)  |
|    | d) | If my peer suffers a cardiac arrest.                                                                                                                                                                                                     | 61 (8)  | 261 (35) | 351 (47) | 55 (7)   | 12 (2)   | 1 (0)  |
| Q5 |    | Imagine you witness a truck that is unable to brake and therefore crashes into the mine wall. The truck catches fire, and it is impossible to get past it. The driver is alive, but trapped. A lot of smoke is emanating from the truck. |         |          |          |          |          |        |
|    | a) | To what extent would you be able to reach a safe location?                                                                                                                                                                               | 78 (11) | 291 (39) | 334 (45) | 17 (2)   | 6 (1)    | 15 (2) |
|    | b) | Do you have the appropriate self-protective equipment?                                                                                                                                                                                   | 65 (9)  | 327 (44) | 319 (43) | 11 (1)   | 5 (1)    | 14 (2) |
|    | c) | Have you been properly trained in self-protection?                                                                                                                                                                                       | 74 (10) | 318 (43) | 291 (39) | 24 (3)   | 17 (2)   | 17 (2) |
|    | d) | Would you know how to act?                                                                                                                                                                                                               | 40 (5)  | 246 (33) | 412 (56) | 25 (3)   | 7 (1)    | 11 (1) |
| Q6 |    | What is the probability of the following incidents occurring?                                                                                                                                                                            |         |          |          |          |          |        |
|    | a) | A major vehicular incident.                                                                                                                                                                                                              | 16 (2)  | 128 (17) | 369 (50) | 191 (26) | 30 (4)   | 7 (1)  |
|    | b) | A major fire incident that requires rescue services to be contacted.                                                                                                                                                                     | 26 (4)  | 161 (22) | 400 (54) | 129 (17) | 16 (2)   | 9 (1)  |
|    | c) | A major explosion involving a risk of injury.                                                                                                                                                                                            | 5 (1)   | 21 (3)   | 204 (28) | 401 (54) | 105 (14) | 5 (1)  |
|    | d) | A major rock-fall involving a risk of being crushed.                                                                                                                                                                                     | 20 (3)  | 82 (11)  | 375 (51) | 218 (29) | 40 (5)   | 6 (1)  |
|    | e) | A combination of explosion, fire and rock-fall.                                                                                                                                                                                          | 8 (1)   | 25 (3)   | 249 (34) | 273 (37) | 174 (23) | 12 (2) |
| Q7 |    | To what extent do you think the following incidents could lead to moderate or more serious injury or death if they occurred in your workplace?                                                                                           |         |          |          |          |          |        |
|    | a) | A severe vehicular incident.                                                                                                                                                                                                             | 54 (7)  | 170 (23) | 292 (39) | 162 (22) | 58 (8)   | 5 (1)  |
|    | b) | A severe fire that requires rescue services to be contacted.                                                                                                                                                                             | 32 (4)  | 157 (21) | 377 (51) | 145 (20) | 28 (4)   | 2 (0)  |
|    | c) | A major rock-fall involving crush injuries to personnel.                                                                                                                                                                                 | 51 (7)  | 107 (14) | 309 (42) | 219 (30) | 52 (7)   | 3 (0)  |
|    | d) | A major explosion.                                                                                                                                                                                                                       | 44 (6)  | 76 (10)  | 194 (26) | 310 (42) | 109 (15) | 8 (1)  |
| Q8 |    | To what extent do you consider that the mine you work in is prepared for an underground incident involving multiple injured parties?                                                                                                     | 42 (6)  | 249 (34) | 347 (47) | 83 (11)  | 12 (2)   | 8 (1)  |

---

EMS=Emergency Medical Services

## Data collection

At the time of study data collection, Sweden had 14 mineral and metalliferous mines of which nine were underground mines. The research team contacted the mine managers of these nine underground mines. Written information about the study and the questionnaire was sent to the managers via email to obtain informed consent, and the main unions were notified about the study. Seven out of nine mine managers agreed to participate and were then sent paper questionnaires via regular post for all employed mineworkers who were working underground. The mine managers were responsible for the distribution and collection of the questionnaires. A letter was attached to each questionnaire to inform the mineworkers that their participation was voluntary and that, by completing the questionnaire, the respondents gave their informed consent for study participation.

At the time of this study, the seven mines employed between 18 and 290 mineworkers. These underground mineral and metalliferous mines were involved in mining zinc, lead, silver, copper, gold and tellurium through various methods, for example, with sub-level stoping at varying maximum depths of between 235 and 1,500 m.[24]

## Analysis

### Descriptive analysis and data management

First, a descriptive analysis of the data was performed, including frequencies, minimum and maximum, mean, standard deviation, skewness and kurtosis. The descriptive analysis indicated that all questions had less than 10% missing values. Imputation with an expectation-maximisation estimation was performed to impute the missing data of the variables included in the analysis.[25]

A significance level of 0.05 was used for all study analyses, and SPSS [26] was used to impute the data with an expectation maximisation estimation, and Stata [27] was used for all other analyses.



## Exploratory factor analysis

Exploratory factor analysis was performed for data reduction purposes [28], to generate relevant analyses of the mineworkers' preparedness based on a rich material, wherein most of the mineworkers had chosen the middle alternative of the Likert Scale for the questions, which made it unclear how the data could fit into logistic regression models. Moreover, a decision to perform an exploratory factor analysis was made to identify latent factors that contribute to the covariance of the manifest variables.[28] Moreover, this made it possible to construct relevant complementing emergency medical factors to the key areas constructed by the Mine Safety Technology and Training Commission.[11] In the exploratory factor analysis, six factors had eigenvalues  $>1$ . However, when comparing the constructs and studying the resulting scree plot, a decision was made to retain three factors with an eigenvalue  $>2$  due to the opportunity to form relevant and meaningful factors as well as the fact that the scree plot started to level out after three factors. The three retained factors were rotated using Promax, and a threshold of 0.5 was chosen for the factor loadings, where a value of 0.5 indicates a strong loading for the items.[28] Therefore, items with a minimum loading of 0.5 from the first, second, and third factors were added together. The three-factor solution is shown in Figure 1. Cronbach's alpha and average inter-item correlations were derived for factors 1, 2, and 3 as 0.86 and 0.41, 0.87 and 0.41, and 0.80 and 0.37, respectively.

The following three factors illustrate the mineworkers' medical peer response preparedness: 1) *Familiarity with rescue procedures during emergencies with injuries*, containing questions Q3, Q4a–Q4d and Q5a–Q5d; 2) *Risk perception of emergencies with injuries*, covering questions Q2, Q6a–Q6e and Q7a–Q7d and 3) *Experience of using self-protective and first aid equipment* containing questions covering Q1a stretcher, bandages, splints, eye rinse, defibrillators, self-contained self-rescuers and fire extinguishers.

### Multiple logistic regression analysis

In the multiple logistic regression analysis, the three factors were used as independent variables and the question “Do you consider yourself prepared to respond (before the EMS or rescue personnel arrive at the incident site) to emergencies, e.g. fire, explosions or rock-falls in the mine?” was used as the global dependent variable. The post-estimation tests of the Pearson chi-square goodness-of-fit test as well as the Hosmer–Lemeshow test were performed and had insignificant results, indicating a goodness of fit for the model.[29]

### Participant and public involvement statement

Neither patients nor the public was included in the design, conduct, reporting, or dissemination plans of the research. However, the questionnaire was tested for face validity from both, mining employer and employee, perspectives.

## RESULTS

The three constructed factors illustrate the aspects of relevance for the mineworkers’ medical peer first-response preparedness. *Familiarity with rescue procedures during emergencies with injuries* includes whether the mineworkers know how to act during stressful situations when there is an emergency, and a peer has been injured in the vicinity. *Risk perception of emergencies with injuries* includes how mineworkers interpret the perceived risk for emergencies with injuries at their workplace. *Experience of using self-protective and first aid equipment* includes aspects of whether the mineworkers have used/know how to use the equipment, such as a stretcher, bandages, splints, self-contained self-rescuers and fire extinguishers. There were significant associations between the three factors of preparedness and the global variable of self-reported preparedness. The associations between the factors and the global variable (Figure 2) are further presented along with relevant highlights of how the 741 mineworkers answered the questionnaire (Table 2).

1  
2  
3 Mineworkers familiar with rescue procedures during emergencies with injuries  
4  
5 felt more prepared to respond before the rescue services and EMS arrived than those who  
6  
7 were unfamiliar with the rescue procedures (OR 1.30, 95% CI 1.22–1.38). As many as 79% of  
8  
9 the 741 mineworkers considered themselves prepared to respond in the event of an  
10  
11 emergency. For example, the mineworkers considered that they, to a high or very high extent,  
12  
13 would know how to act if the driver is moderately or more seriously injured when a vehicle  
14  
15 crashes (33%), or when a vehicle catches fire (38%, and an additional 56% would to some  
16  
17 extent, know what to do). Almost all (91%) respondents reported that they had received first  
18  
19 aid training, and 22% had experience in helping an injured peer. However, if a peer was  
20  
21 moderately or more severely injured, only 27% considered themselves, to a high or very high  
22  
23 extent, of being able to help. Nearly two-thirds (60%) of the mineworkers thought that they,  
24  
25 to some extent, knew how to provide a peer first aid response and help a moderately or more  
26  
27 severely injured peer, whereas 43% of the mineworkers knew, to a very high or high extent,  
28  
29 how to act if a peer would suffer a cardiac arrest.  
30  
31  
32  
33  
34  
35

36 Mineworkers who considered that there was a great risk of emergencies with  
37  
38 injuries believed themselves to be less prepared to respond than those who considered that  
39  
40 there was a low risk of incidents (OR 0.95, 95% CI 0.91–0.98). Overall, 80% of the  
41  
42 mineworkers considered the risk of injuring themselves at their workplace to be moderate to  
43  
44 severe. However, most mineworkers (87%) believed that their mine was prepared for an  
45  
46 underground incident involving multiple injured mineworkers, with moderate to very high  
47  
48 degree of injury severity. When asked what kind of major incident scenarios they thought  
49  
50 were likely, 80% of the mineworkers considered that the risk of a major fire incident that  
51  
52 would require the rescue service to be contacted was moderate to severe. One-fourth (25%) of  
53  
54 the mineworkers believed that there was a high or very high risk for moderate or more serious  
55  
56 injury during major fire incidents. Although major fires were considered probable, explosions  
57  
58  
59  
60

1  
2  
3 were not considered to be as likely; 68% of the mineworkers imputed a low or very low risk  
4 of major explosions involving injury, and 57% thought there was a low or very low risk of  
5 major explosions leading to moderate or more serious injury or death.  
6  
7  
8  
9

10 Mineworkers with experience using their self-protective and first aid equipment  
11 were more prone to respond than those without this experience (OR 1.19, 95% CI 1.07–1.32).  
12  
13 In order to help injured peers, workers have to have knowledge in, access to and confidence in  
14 using several different kinds of self-protective and first aid equipment; to mention a few, 68%  
15 had access to a stretcher, about one fourth (24%) of the mineworkers had used one, and 55%  
16 considered themselves comfortable using stretchers. Seventy-five percent of the mineworkers  
17 considered themselves to be comfortable using bandages and 25% were comfortable using  
18 splints; 85% of the mineworkers had access to a defibrillator, 44% had used one, and 60%  
19 considered themselves comfortable using a defibrillator. Moreover, 73% of the mineworkers  
20 had used a fire extinguisher, and almost all (95%) felt comfortable using it.  
21  
22  
23  
24  
25  
26  
27  
28  
29  
30  
31  
32  
33

## 34 **DISCUSSION**

35 This study resulted in the identification of three factors: (i) *Familiarity with rescue*  
36 *procedures during emergencies with injuries*, (ii) *risk perception of emergencies with injuries*  
37 and (iii) *experience of using self-protective and first aid equipment*, which were of importance  
38 for mineworkers' perceived level of preparedness for emergencies resulting in injuries. These  
39 three factors have an emergency medical dimension with regard to the scenarios, including  
40 preparedness for taking care of injured mineworkers. Thus, the three identified factors can be  
41 viewed as being complementary to the three factors identified by the Mine Safety Technology  
42 and Training Commission for mineworkers to be able to self-escape or be rescued during  
43 emergencies in underground mines.[11]  
44  
45  
46  
47  
48  
49  
50  
51  
52  
53  
54  
55  
56

57 The first factor of this study indicated that mineworkers familiar with rescue  
58 procedures considered themselves to be more prepared to respond to incidents before the  
59  
60

1  
2  
3 rescue services and emergency medical service arrived than those who were unfamiliar with  
4 the rescue procedures. In this study, the mineworkers were asked if they knew how to act in  
5 several difficult situations involving an injured peer (Table 2). Although the mineworkers  
6 generally considered themselves prepared to respond (79%), their answers indicated that  
7 certain scenarios could prove difficult. For example, the mineworkers were somewhat  
8 confident in what they should do if the driver is moderately or more seriously injured when a  
9 vehicle crashes (57%), or when a vehicle catches fire (56%). Their ability to respond during  
10 such stressful situations included making sound decisions and judgements.[30] Prior training  
11 or experience of incidents have been shown to result in a better state of preparedness and to  
12 influence action during infrequent incidents that cause severe consequences.[3] For example,  
13 those with prior experience of escaping from a smoke-filled mine reported feeling less stress  
14 during an exercise under similar conditions, whereas mineworkers lacking this experience  
15 generally acted more on intuition than prior knowledge.[31] As in this study, training  
16 mineworkers in their emergency skills has been shown to increase their preparedness for  
17 handling emergencies.[30] However, the efficacy of self-escape training in communication,  
18 collaboration, leadership development, responsibility and accountability may be limited due  
19 to both structural and individual factors.[32] Another study[21] reported that mineworkers  
20 responding to dilemmas about critical self-rescue and escape skills did not always choose the  
21 safest option, though they understood the consequences of their choices. Two difficult  
22 dilemmas of that study included (i) leaving an injured mineworker behind and (ii) trying to  
23 rescue missing mineworkers during unsafe conditions.[21] Because mineworkers often  
24 respond to emergencies as a group,[11] they have to make optimal decisions for the whole  
25 group to escape. Training mineworkers to collaboratively make decisions and self-escape in  
26 simulated smoke may improve their ability to escape.[11] Thus, based on the results of this  
27 study, training the mineworkers in the appropriate responses may improve their preparedness  
28  
29  
30  
31  
32  
33  
34  
35  
36  
37  
38  
39  
40  
41  
42  
43  
44  
45  
46  
47  
48  
49  
50  
51  
52  
53  
54  
55  
56  
57  
58  
59  
60

1  
2  
3 to act if their peers are injured. Their training may include table-top exercises, where the  
4  
5 mineworkers can discuss different dilemmas and best practices when handling injuries,  
6  
7 focussed training on how to perform a procedure and full-scale scenario training.  
8  
9

10 The second factor in this study indicated that mineworkers who considered that  
11  
12 there was a significant risk of emergencies with injuries assessed themselves as being less  
13  
14 prepared to act before the rescue and emergency medical services arrived than those who  
15  
16 considered that there was a low risk. Thus, this is perhaps a contradiction to another  
17  
18 study[33], which reported that people with more experience and education of disasters and  
19  
20 emergencies perceive a higher risk of emergencies and, therefore, are more prepared for new  
21  
22 emergencies. In this study, 29% and 51% of the mineworkers considered that there was a high  
23  
24 or very high risk and moderate risk of sustaining workplace injuries, respectively.  
25  
26 Furthermore, mineworkers considered that major fires were likely to occur, whereas  
27  
28 uncontrolled explosions were not. The risk of the Swedish mineworkers sustaining a  
29  
30 workplace injury has substantially decreased during the past 30 years, from 50.3 incidents per  
31  
32 1 million working hours to 7.1 in 2015, because of investments in both technological  
33  
34 development and in organisational measures (e.g. the initiative of "Safety First").[34] The  
35  
36 Swedish mining companies are required, according to the Civil Protection Act,[35] to be  
37  
38 prepared for emergencies, which can occur even though relevant preventative measures have  
39  
40 been implemented.[9] The Swedish mines, for example, utilise an emergency plan of action  
41  
42 until the rescue service personnel arrive,[36] because, despite being uncommon, emergencies  
43  
44 may include a risk to the life and health of the mineworkers.[1] Examples of major Swedish  
45  
46 incidents include a major fire incident in 2013 [37], and rock-falls caused by seismic events in  
47  
48 the mine in 2020.[38] The safety of mineworkers depends on their knowledge and ability to  
49  
50 recognise and respond to hazards, and that might be influenced by training and  
51  
52 experience.[39] The Swedish mineworkers consider emergencies to be wake-up calls, and  
53  
54  
55  
56  
57  
58  
59  
60

1  
2  
3 while the underlying problems are usually corrected, the mineworkers raise concerns about  
4 being trapped by a rock-fall or whether they could be rescued during major fires because of a  
5 complicated rescue operation.[35] Thus, though objective measures prove the decreased  
6 frequency of incidents, several mineworkers believe that there exists a risk of emergencies  
7 that can lead to injury or death. The findings of this study indicate which of the emergency  
8 scenarios the mineworkers think are most likely, and thus a combination of prevention and  
9 preparedness strategies can be implemented to improve the mineworker's perception of the  
10 associated risks.  
11  
12  
13  
14  
15  
16  
17  
18  
19  
20  
21

22 The third factor indicates that mineworkers with experience in using self-  
23 protective and first aid equipment, such as self-contained self-rescuers (50%), bandages  
24 (52%) or defibrillators (44%), also considered themselves to be more prepared to respond  
25 during emergencies involving injuries. Hands-on training with first aid equipment improves  
26 layperson skills.[40] Other authors have recommended that mineworkers practise using self-  
27 contained self-rescuers because, on several occasions, mineworkers have claimed that their  
28 equipment did not work in a real emergency.[3] The equipment used during emergencies  
29 needs to be easy to use, even in highly stressful situations.[8] To increase the preparedness of  
30 Swedish mineworkers, the mandatory annual evacuation training[18] may preferably include  
31 the use of self-protective and first aid equipment. This supports the inclusion of practical  
32 training sessions in first aid courses, together with systematic training in the use of relevant  
33 self-protective and first aid equipment. Almost all of the mineworkers included in this study  
34 had been trained in first aid, as also reported from another Swedish study [35] which indicated  
35 that the mineworkers are trained to provide first aid and cardiopulmonary resuscitation and to  
36 use defibrillators. This means that the mineworkers have been educated in effective and safe  
37 techniques of first aid while using minimal or no equipment to provide initial care if a peer is  
38 injured or suffering from an acute illness.[41, 42] Furthermore, educating mineworkers in first  
39  
40  
41  
42  
43  
44  
45  
46  
47  
48  
49  
50  
51  
52  
53  
54  
55  
56  
57  
58  
59  
60

1  
2  
3 aid improves their confidence and likelihood of performing lifesaving first aid.[43] However,  
4  
5 current first aid courses generally do not cover trauma or mass-casualty situations [44] or  
6  
7 situations where professional help is far away.[41] The majority of the mineworkers (60%)  
8  
9 believed that they, to some extent, would know how to help a severely injured peer. This  
10  
11 might be due to the peers feeling of helplessness because they are unable to provide the  
12  
13 appropriate level of care to the injured.[17] For example, though 60% of the mineworkers in  
14  
15 this study felt comfortable using a defibrillator for cardiopulmonary resuscitation, they may  
16  
17 feel exposed and powerless.[45] Other authors have shown that, in general, people tend to  
18  
19 help injured people but may have low confidence in their first aid skills and training, with  
20  
21 several other barriers for delivering first aid, for example, worry about making mistakes that  
22  
23 could further harm the injured person.[46-48] In line with our findings, training responders in  
24  
25 first aid, as recommended by other authors,[47, 48] could improve their self-confidence and  
26  
27 willingness to respond. The first aid training might focus on typical injuries and illnesses  
28  
29 relevant to the underground environment. Training has been shown to increase the likelihood  
30  
31 of optimal behaviour and decrease the risk of injury,[49] but it needs to be context-sensitive  
32  
33 and consider the specific conditions in different mines,[50] whereas providing each  
34  
35 mineworker with sophisticated training in evacuation strategies.[17] Thus, mining companies  
36  
37 may consider this aspect, particularly as the onsite mineworkers are not only immediate  
38  
39 responders, but some of them also have duties as guides for rescue services.[35] Most of the  
40  
41 mineworkers in this study attended regular first aid courses and, thus, the connection to the  
42  
43 underground mining incident panorama might not have been evident. Moreover, in the first  
44  
45 aid course, discussions of the psychological strain that emergencies with injuries could  
46  
47 impose on the mineworkers could be included. These may be necessary for mineworkers to  
48  
49 help a moderately or more severely injured peer in a rescue chamber for a long time before  
50  
51 the arrival of rescue and emergency services. Therefore, modifying the first aid course to  
52  
53  
54  
55  
56  
57  
58  
59  
60



1  
2  
3 become more relevant to the mining context, including with regard to the psychological  
4 aspects, needs to be further explored.  
5  
6

### 7 **Limitations**

8 The strengths of this study include the fact that seven out of nine mines chose to participate.  
9  
10 The response rate was high (73%), which was adequate to assess the preparedness of the  
11 Swedish mineworkers. The decision to perform exploratory factor and multiple logistic  
12 regression analyses facilitated the analysis of a rich data material and the development of  
13 complementary factors associated with emergency medical preparedness to the key areas  
14 developed by the Mine Safety Technology and Training Commission. The multiple logistic  
15 regression analysis has insignificant post-estimation tests, indicating a suitable goodness of fit  
16 of the model.  
17  
18  
19  
20  
21  
22  
23  
24  
25  
26

27           Nonetheless, this study has some limitations. A drawback of the questionnaire  
28 was that most mineworkers chose the middle alternative of the Likert scale when answering  
29 the questions, which perhaps could have been counteracted by including another scale. The  
30 questionnaire itself was evaluated by the face validity of three mineworkers with vast  
31 experience of the mining environment in order to make the questions appropriate for the  
32 underground mine setting. Moreover, the questionnaire was discussed and improved  
33 iteratively by the research team before the questionnaires were sent out. However, a  
34 comprehensive pilot study might have improved the questionnaire further, as would a  
35 test/retest or random response test. Furthermore, this study analysed the self-assessed  
36 preparedness of mineworkers. More objective measures could have been obtained if a  
37 knowledge test or observations were performed on full-scale exercises. However, these were  
38 judged to be resource-intensive and beyond the scope of this study.  
39  
40  
41  
42  
43  
44  
45  
46  
47  
48  
49  
50  
51  
52  
53  
54  
55  
56  
57  
58  
59  
60

## CONCLUSIONS

All mineworkers have to be readily prepared to act as immediate responders and care for their injured peers for a possibly extensive period until professional help arrives. We identified three factors important in the preparedness for peer support in underground mining environments. More research is needed to create evidence-based first aid courses that are adapted and contextualised to the needs of peer responders.

**Acknowledgements:** The authors would like to express gratitude to the mining companies and workers involved in the research, especially those who helped develop the questionnaire. Furthermore, the authors are grateful to Dr. Johan Svensson at the Umeå School of Business, Economics, and Statistics for expert technical assistance with data analysis. We would like to thank Editage ([www.editage.com](http://www.editage.com)) for English language editing.

**Contributors:** The study was initiated, conceptualised, and supervised by BIS, UB, LG, and SK. SK collected and analysed the data and drafted the manuscript. The manuscript was reviewed and revised by SK, BIS, UB, MH, and LG. All authors have read and approved the final version of the manuscript.

**Funding:** This work was supported by the Swedish National Board of Health and Welfare and the European Regional Development Fund under the project Safety & Security Test Arena.

**Competing interests:** None declared.

**Patient consent for publication:** Not applicable

**Ethical considerations:** The study was performed in accordance with the Declaration of Helsinki. The subject area and methods of this study were excluded from ethical whetting in accordance with the regulations of the Swedish Act concerning the Ethical Review of Research Involving Humans (SFS 2003:460); therefore, no ethical permission has been

1  
2  
3 sought. Measures were taken to protect the anonymity and free will of the participants. The  
4  
5 participating mines were sent paper questionnaires and information letters. The information  
6  
7 letters informed the participants about the study and that participation was completely  
8  
9 voluntary. Furthermore, they were informed that the results were to be presented at the group  
10  
11 level, and no one would be able to identify individual answers. Although the participants were  
12  
13 encouraged to answer all questions, they were free to hand in a blank or partially answered  
14  
15 questionnaire. No sensitive personal information was collected. The participants provided  
16  
17 their informed consent by anonymously answering the questionnaires. The participants were  
18  
19 completely anonymised to the researchers as the data collection method made it impossible to  
20  
21 create code lists.  
22  
23  
24

25  
26 **Data availability statement:** All data relevant to the study are included in the article.  
27  
28

## 29 30 REFERENCES

- 31  
32 1 Bealko SB, Alexander DW, Chasko LL, et al. Mine rescue training facility inventory -  
33  
34 compendium of ideas to improve US coal mine rescue training: The National Institute for  
35  
36 Occupational Safety and Health (NIOSH). *Trans Soc Min Metall Explor Inc* 2011;517–24.  
37  
38 2 Enright C, Ferriter RL. Mine Rescue Manual: A Comprehensive Guide for Mine Rescue  
39  
40 Team Members. Englewood, Colorado: Society for Mining, Metallurgy & Exploration Inc.  
41  
42 (SME) 2014:74–99.  
43  
44 3 Kowalski-Trakofler KM, Vaught C, Brnich MJ, Jr. Expectations training for miners using  
45  
46 self-contained self-rescuers in escapes from underground coal mines. *J Occup Environ Hyg*  
47  
48 2008;5:671–7. doi: 10.1080/15459620802333632  
49  
50 4 Engström KG, Angrén J, Björnstig U, et al. Mass-casualty incidents in the underground  
51  
52 mining industry: Applying the Haddon Matrix on an integrative literature review. *Disaster*  
53  
54 *Med Public Health Prep* 2018;12:138–46. doi: 10.1017/dmp.2017.31  
55  
56  
57  
58  
59  
60

1  
2  
3 5 Lehnen F. Mine Rescue Management: A Concept for Long-Lasting Missions Based on Case  
4 Study Analysis and Disaster Management Approaches (Doctoral dissertation, Rheinisch-  
5 Westfälische Technische Hochschule Aachen) 2016.  
6  
7

8  
9  
10 6 Hansen R. Overview of fire and smoke spread in underground mines. Fourth International  
11 Symposium on Tunnel Safety and Security, Frankfurt am Main, Germany 2010, March:483–  
12 494.  
13  
14

15  
16  
17 7 Lehnen F, Martens PN, Rattman L. Evaluation of European mine rescue and its need for  
18 internationalisation. Fourth International Symposium Mineral Resources and Mine  
19 Development: 22-23 May 2013. Aachen International Mining Symposia: RWTH Aachen  
20 University, Germany 2013:175–86.  
21  
22  
23

24  
25  
26 8 Brake R. An integrated strategy for emergency egress from an underground metal mine.  
27 Eight US Mine Ventilation congress. University of Missouri, Rolla, Missouri 1999, June 11-  
28 17:649–657  
29  
30  
31

32  
33 9 Swedish Mining Industry's Health and Safety Committee. Brandskydd i gruv- och  
34 berganläggningar: Samlade råd och anvisningar. [Fire Safety in Mines and Underground  
35 Constructions]. Stockholm: Swedish Association of Mines, Metal and Mineral Producers  
36  
37  
38  
39  
40 2016.  
41

42  
43 10 Conti RS. Responders to underground mine fires. Thirty-Second Annual Conference of the  
44 Institute on Mining Health, Safety and Research. Salt Lake City, Utah 2001, August:111–121.  
45

46  
47 11 Mine Safety Technology and Training Commission. Improving mine safety technology  
48 and training: establishing U.S. global leadership. Washington D.C.: National Mining  
49 Association, 2006:68–90.  
50  
51

52  
53 12 Helsloot I, Ruitenbergh A. Citizen response to disasters: a survey of literature and some  
54 practical implications. *Journal of Contingencies and Crisis Management* 2004;12:98–111.  
55  
56  
57  
58  
59  
60  
doi: 10.1111/j.0966-0879.2004.00440.x

1  
2  
3 13 Harris C, McCarthy K, Liu EL, et al. Expanding understanding of response roles: an  
4 examination of immediate and first responders in the United States. *Int J Environ Res Public*  
5 *Health* 2018;15:534. doi: 10.3390/ijerph15030534  
6  
7

8  
9  
10 14 Whittaker J, McLennan B, Handmer J. A review of informal volunteerism in emergencies  
11 and disasters: Definition, opportunities and challenges. *Int J Disaster Risk Reduction*  
12 2015;13:358–68. doi: 10.1016/j.ijdrr.2015.07.010  
13  
14

15  
16  
17 15 Xiao T, Horberry T, Cliff D. Analysing mine emergency management needs: a cognitive  
18 work analysis approach. *Int J Emerg Manag* 2015;11:191–208.  
19

20  
21 16 Kitch C. Mourning “men joined in peril and purpose”: working-class heroism in news  
22 repair of the sago miners’ story. *Critical Studies in Media Communication* 2007;24:115–31.  
23  
24  
25  
26  
27  
28  
29  
30  
31  
32  
33  
34  
35  
36  
37  
38  
39  
40  
41  
42  
43  
44  
45  
46  
47  
48  
49  
50  
51  
52  
53  
54  
55  
56  
57  
58  
59  
60

17 Kowalski-Trakofler KM, Vaught C. Psycho-social issues in mine emergencies: the impact  
on the individual, the organization and the community. *Minerals* 2012;2:129–68. doi:  
10.3390/min2020129

18 Swedish Work Environment Authority. Berg- och gruvarbete: Arbetsmiljöverkets  
föreskrifter om berg- och gruvarbete samt allmänna råd om tillämpningen av föreskrifterna.  
[Mountain and mining quarrying: Swedish Work Environment Authority’s legislation about  
mountain and mining quarrying and also general advice about the application of the  
legislation]. Stockholm: Swedish Work Environment Authority 2010.

19 Swedish Work Environment Authority. Första hjälpen och krisstöd:  
Arbetskyddsstyrelsens föreskrifter om första hjälpen och krisstöd samt allmänna råd om  
tillämpningen av föreskrifterna [First aid and social and psychological support: Swedish Work  
Environment Authority’s regulations about first aid and social and psychological support and  
general advice on application of the regulations]. Stockholm: Swedish Work Environment  
Authority 1999.

- 1  
2  
3 20 Conti RS, Chasko LL, Wiehagen WJ, et al. Fire response preparedness for underground  
4 mines. Pittsburgh, PA: Centers for Disease Control and Prevention, National Institute for  
5 Occupational Safety and Health, 2005.  
6  
7  
8  
9  
10 21 Cole HP, Vaught C, Wiehagen WJ, et al. Decision making during a simulated mine fire  
11 escape. *IEEE Trans Eng Manage* 1998;45:153–62. doi: 10.1109/17.669762.  
12  
13  
14 22 Slepiski LA. Emergency preparedness: concept development for nursing practice. *Nurs*  
15 *Clin N Am* 2005;40:419–30, vii. doi: 10.1016/j.cnur.2005.04.011  
16  
17  
18  
19 23 Walle M, Jennings N. Safety & health in small-scale surface mines: A handbook. Geneva:  
20 International Labour Organization 2001:20  
21  
22  
23 24 Geological Survey of Sweden. Bergverksstatistik 2019. [Statistics of the Swedish Mining  
24 Industry 2019]. Uppsala: Geological Survey of Sweden 2020.  
25  
26  
27  
28 25 Dong Y, Peng CYJ. Principled missing data methods for researchers. *Springer Plus*  
29 2013;2:1–17. doi: 10.1186/2193-1801-2-222  
30  
31  
32  
33 26 IBM SPSS Statistics for Windows, Version 24.0. [program]. Armonk, NY: IBM Corp.  
34 2016.  
35  
36  
37 27 Stata Statistical Software: Release 14. [program]. College Station, TX: StataCorp LP.  
38 2015.  
39  
40  
41  
42 28 Costello AB, Osborne JW. Best practices in exploratory factor analysis: four  
43 recommendations for getting the most from your analysis. *Pract Assess Res Evaluation*  
44 2005;10:1–9.  
45  
46  
47  
48 29 StataCorp. Stata base reference manual - Release 14. College Station, Texas, USA:  
49 StataCorp LP. 2015.  
50  
51  
52  
53 30 Brnich MJ Jr, Hall EE. Incorporating Judgment and Decisionmaking into Quarterly Mine  
54 Escape Training Based on a Mine Fire Scenario. Pittsburgh, PA: U.S.: Department of Health  
55  
56  
57  
58  
59  
60

- 1  
2  
3 and Human Services, Centers for Disease Control and Prevention, National Institute for  
4 Occupational Safety and Health, NIOSH 2013: 1–16.
- 5  
6  
7 31 Kowalski-Trakofler KM, Vaught C, Scharf, T. Judgement and decision making under  
8 stress: an overview for emergency managers. *Int J Emerg Manag* 2003;1:278–89. doi:  
9  
10 10.1504/IJEM.2003.003297
- 11  
12  
13 32 Haas EJ, Hoebbel CL, Rost KA. An analysis of trainers' perspectives within an ecological  
14 framework: factors that influence mine safety training processes. *Saf Health Work*  
15 2014;5:118–24. doi: 10.1016/j.shaw.2014.06.004
- 16  
17  
18 33 Mishra S, Suar D. Do lessons people learn determine disaster cognition and preparedness?  
19 *Psychol Dev Soc J* 2007;19:143–59. doi: 10.1177/097133360701900201
- 20  
21  
22 34 Lööv J, Nygren M. Initiatives for increased safety in the Swedish mining industry:  
23 Studying 30 years of improved accident rates. *Safety Science* 2019;117:437–46. doi:  
24 10.1016/j.ssci.2019.04.043
- 25  
26  
27 35 Swedish Code of Statutes. Lag (SFS 2003:778) om skydd mot olyckor. [Civil Protection  
28 Act]. Stockholm: Ministry of Justice 2003.
- 29  
30  
31 36 Karlsson S, Gyllencreutz L, Engström G, et al. Preparedness for mining injury incidents -  
32 Interviews with Swedish rescuers. *Safety Science Monitor* 2017;20:1–10.
- 33  
34  
35 37 Marklund J, Haarala D. Fördjupad olycksundersökning gruvbrand 2013-08-25. [Incident  
36 investigation of fire in mine 2013-08-25]. Skellefteå: Skellefteå Kommun, Räddningstjänsten  
37 2014: 1–29.
- 38  
39  
40 38 Luossavaara-Kiirunavaara AB. Sättningar i Kiruna den 18 maj. [Geological settings in  
41 Kiruna the 18 May] Luossavaara-Kiirunavaara AB. 18 May 2020.  
42  
43  
44 [https://www.lkab.com/sv/hallbarhet/miljo/seismiska-handelser/seismiska-handelser-](https://www.lkab.com/sv/hallbarhet/miljo/seismiska-handelser/seismiska-handelser-kiruna/sattningar-i-kiruna-den-18-maj/)  
45  
46  
47  
48  
49  
50  
51  
52  
53  
54  
55  
56  
57  
58  
59  
60  
61  
62  
63  
64  
65  
66  
67  
68  
69  
70  
71  
72  
73  
74  
75  
76  
77  
78  
79  
80  
81  
82  
83  
84  
85  
86  
87  
88  
89  
90  
91  
92  
93  
94  
95  
96  
97  
98  
99  
100  
[kiruna/sattningar-i-kiruna-den-18-maj/](https://www.lkab.com/sv/hallbarhet/miljo/seismiska-handelser/seismiska-handelser-kiruna/sattningar-i-kiruna-den-18-maj/) (accessed July, 31 2020).

- 1  
2  
3 39 Kowalski-Trakofler KM, Vaught C, Brnich MJ, et al. A study of first moments in  
4  
5 underground mine emergency response. *Journal of Homeland Security and Emergency*  
6  
7 *Management* 2010;7. doi: 10.2202/1547-7355.1652  
8  
9  
10 40 Goralnick E, Chaudhary MA, McCarty JC, et al. Effectiveness of instructional  
11  
12 interventions for hemorrhage control readiness for laypersons in the Public Access and  
13  
14 Tourniquet Training Study (PATTS) – a randomised clinical trial. *JAMA Surg* 2018;153:791–  
15  
16 9. doi: 10.1001/jamasurg.2018.1099  
17  
18  
19 41 Van de Velde S, Broos P, Van Bouwelen M, et al. European first aid guidelines.  
20  
21 *Resuscitation* 2007;72:240–51. doi: 10.1016/j.resuscitation.2006.10.023  
22  
23  
24 42 Zideman DA, De Buck EDJ, Singletary EM, et al. European Resuscitation Council  
25  
26 Guidelines for Resuscitation 2015 Section 9. First Aid. *Resuscitation* 2015;95:278–87. doi:  
27  
28 10.1016/j.resuscitation.2015.07.031  
29  
30  
31 43 Garcia EA, Likourezos A, Ramsay C, et al. Evaluation of Emergency Medicine  
32  
33 Community Educational Program. *West J Emerg Med* 2010;11:416–8. doi:  
34  
35 <https://escholarship.org/uc/item/7b1195xw>  
36  
37  
38 44 Khorram-Manesh A, Plegas P, Högstedt Å, et al. Immediate response to major incidents:  
39  
40 defining an immediate responder! *Eur J Trauma Emerg Surg* 2019:1–12. doi:  
41  
42 10.1007/s00068-019-01133-1  
43  
44  
45 45 Axelsson Å, Herlitz J, Fridlund B. How bystanders perceive their cardiopulmonary  
46  
47 resuscitation intervention: a qualitative study. *Resuscitation* 2000;47:71–81. doi:  
48  
49 10.1016/s0300-9572(00)00209-4  
50  
51  
52 46 Heard CL, Pearce JM, Rogers MB. Mapping the public first-aid training landscape: uptake,  
53  
54 knowledge confidence and willingness to deliver first aid in disasters/emergencies – a scoping  
55  
56 review. *Disasters* 2019:1–77. doi: 10.1111/disa.12374.  
57  
58  
59  
60



1  
2  
3 47 Ross EM, Redman TT, Mapp JG, et al. Stop the bleed: the effect of hemorrhage control  
4 education on laypersons' willingness to respond during a traumatic medical emergency.

5  
6  
7  
8 *Prehosp Disaster Med* 2018;33:127–32. doi: 10.1017/S1049023X18000055

9  
10 48 Riegel B, Mosesso VN, Birnbaum A, et al. Stress reactions and perceived difficulties of  
11 lay responders to a medical emergency. *Resuscitation* 2006;70:98–106. doi:

12  
13  
14  
15 10.1016/j.resuscitation.2005.10.029

16  
17 49 Schouten R, Callahan MV, Bryant S Community response to disaster: the role of the  
18 workplace. *Harv Rev Psychiatry* 2004;12:229–37. doi: 10.1080/10673220490509624

19  
20  
21 50 Passmore D, Bennett J, Radomsky M, et al. Tailored safety training for miners in small  
22 Pennsylvania surface coal mines. *Am J Pub Health* 1990;80:1134–5.

### Figure Legends

**Figure 1.** a) Heatmap illustrating the loadings of the questions to the three factors, where 0.5 was the lower limit for being included in the respective factor and b) Heatmap illustrating the unexplained variance of the questions to the three factors.

**Figure 2.** Odds ratios and 95% confidence intervals showing the association between the three factors and the global variable of self-assessed preparedness to act before the rescue service and EMS arrive.

For peer review only

Factor loading

Unexplained variance

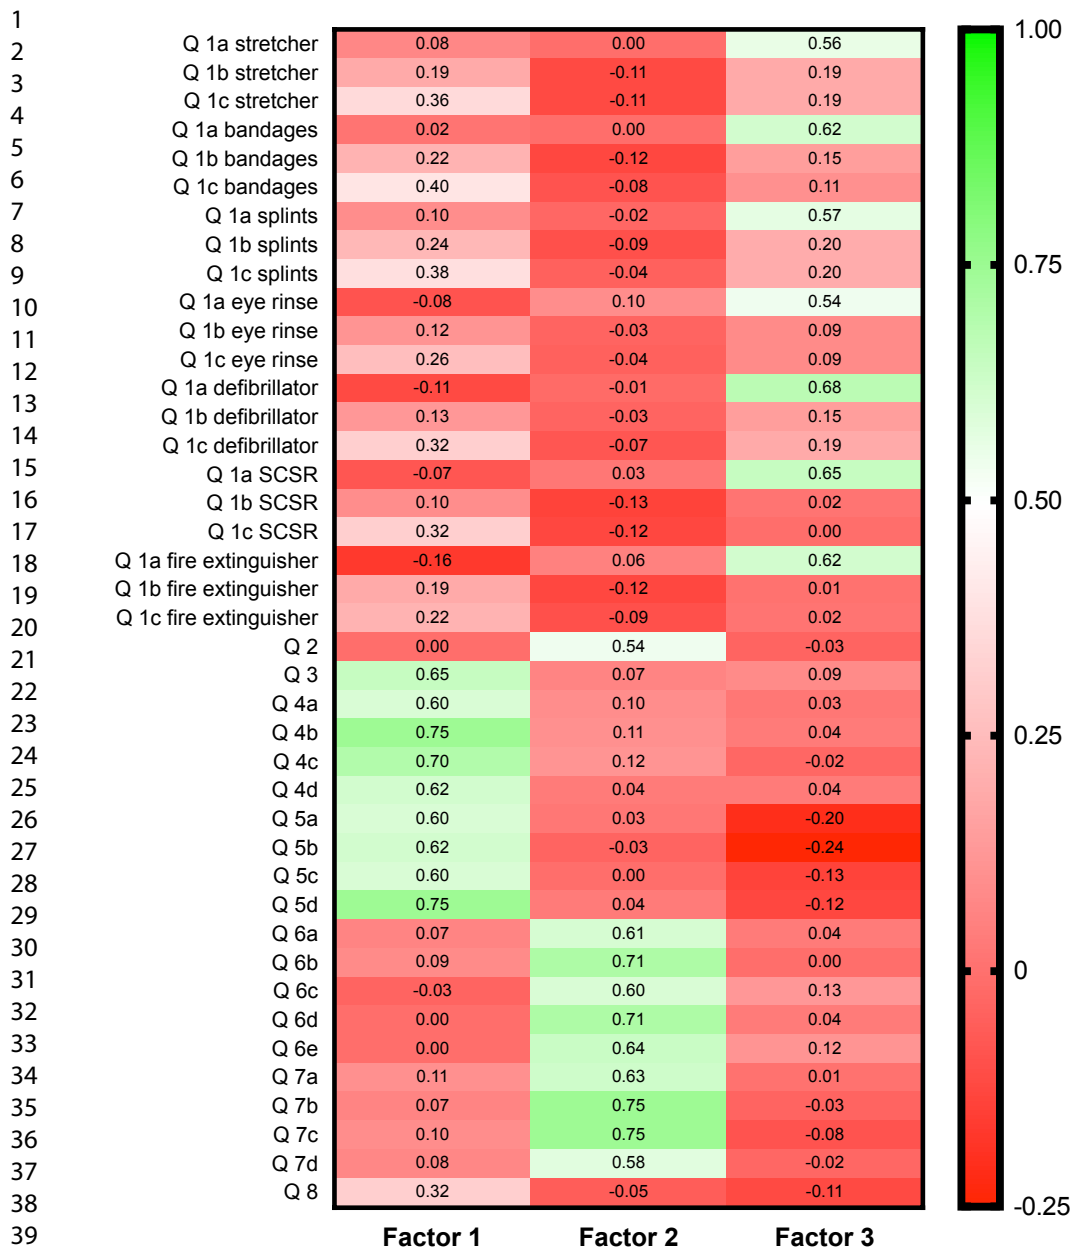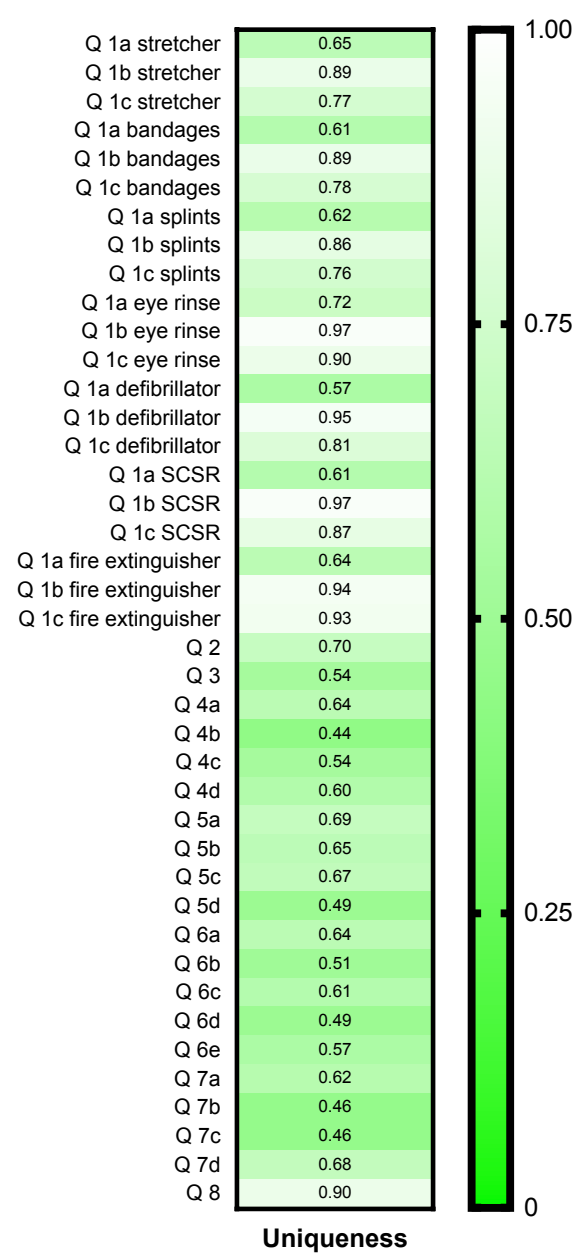

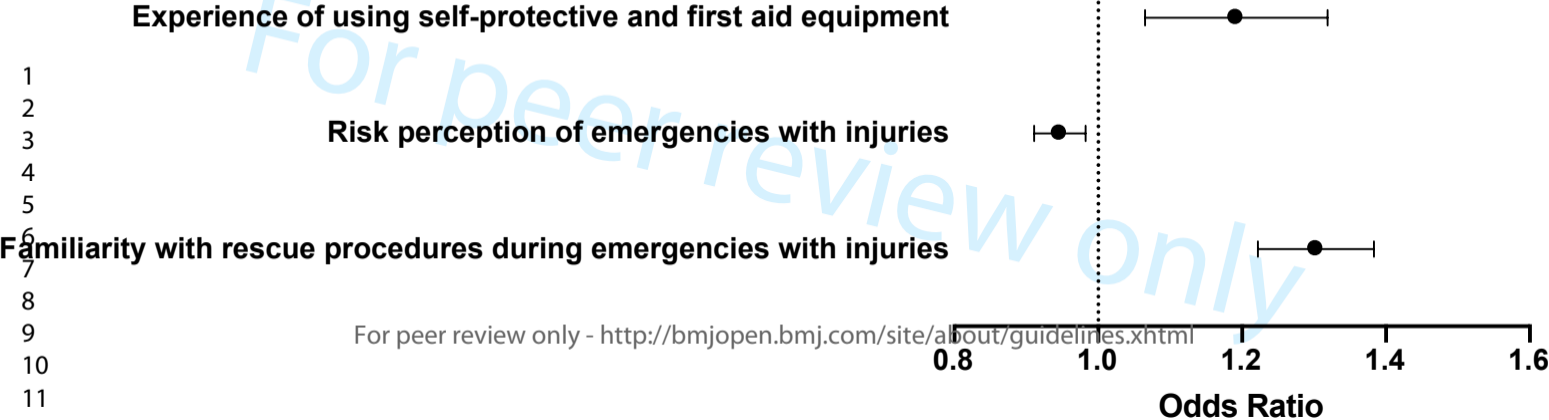

STROBE Statement—Checklist of items that should be included in reports of *cross-sectional studies*

|                              | Item No | Recommendation                                                                                                                                                                                    | Page                      |
|------------------------------|---------|---------------------------------------------------------------------------------------------------------------------------------------------------------------------------------------------------|---------------------------|
| <b>Title and abstract</b>    | 1       | (a) Indicate the study's design with a commonly used term in the title or the abstract                                                                                                            | 1                         |
|                              |         | (b) Provide in the abstract an informative and balanced summary of what was done and what was found                                                                                               | 2                         |
| <b>Introduction</b>          |         |                                                                                                                                                                                                   |                           |
| Background/rationale         | 2       | Explain the scientific background and rationale for the investigation being reported                                                                                                              | 4-5                       |
| Objectives                   | 3       | State specific objectives, including any prespecified hypotheses                                                                                                                                  | 5                         |
| <b>Methods</b>               |         |                                                                                                                                                                                                   |                           |
| Study design                 | 4       | Present key elements of study design early in the paper                                                                                                                                           | 6                         |
| Setting                      | 5       | Describe the setting, locations, and relevant dates, including periods of recruitment, exposure, follow-up, and data collection                                                                   | 6-7, 10                   |
| Participants                 | 6       | (a) Give the eligibility criteria, and the sources and methods of selection of participants                                                                                                       | 6-7, 10                   |
| Variables                    | 7       | Clearly define all outcomes, exposures, predictors, potential confounders, and effect modifiers. Give diagnostic criteria, if applicable                                                          | 6-7, 10                   |
| Data sources/<br>measurement | 8*      | For each variable of interest, give sources of data and details of methods of assessment (measurement). Describe comparability of assessment methods if there is more than one group              | 6-7, 10<br>Table 1<br>& 2 |
| Bias                         | 9       | Describe any efforts to address potential sources of bias                                                                                                                                         | 6-12                      |
| Study size                   | 10      | Explain how the study size was arrived at                                                                                                                                                         | N/A, 6-7, 10              |
| Quantitative variables       | 11      | Explain how quantitative variables were handled in the analyses. If applicable, describe which groupings were chosen and why                                                                      | 6-12<br>Table 2           |
| Statistical methods          | 12      | (a) Describe all statistical methods, including those used to control for confounding                                                                                                             | 10-12,<br>Figure 1        |
|                              |         | (b) Describe any methods used to examine subgroups and interactions                                                                                                                               | N/A                       |
|                              |         | (c) Explain how missing data were addressed                                                                                                                                                       | 6, 10                     |
|                              |         | (d) If applicable, describe analytical methods taking account of sampling strategy                                                                                                                | N/A                       |
|                              |         | (e) Describe any sensitivity analyses                                                                                                                                                             | 12                        |
| <b>Results</b>               |         |                                                                                                                                                                                                   |                           |
| Participants                 | 13*     | (a) Report numbers of individuals at each stage of study—eg numbers potentially eligible, examined for eligibility, confirmed eligible, included in the study, completing follow-up, and analysed | 12                        |
|                              |         | (b) Give reasons for non-participation at each stage                                                                                                                                              | N/A                       |
|                              |         | (c) Consider use of a flow diagram                                                                                                                                                                | N/A                       |
| Descriptive data             | 14*     | (a) Give characteristics of study participants (eg demographic, clinical, social) and information on exposures and potential confounders                                                          | Table 1                   |
|                              |         | (b) Indicate number of participants with missing data for each variable of interest                                                                                                               | Table 2                   |
| Outcome data                 | 15*     | Report numbers of outcome events or summary measures                                                                                                                                              | 12-14<br>Figure           |

|                          |    |                                                                                                                                                                                                              |        |
|--------------------------|----|--------------------------------------------------------------------------------------------------------------------------------------------------------------------------------------------------------------|--------|
|                          |    |                                                                                                                                                                                                              | 1 & 2  |
| Main results             | 16 | (a) Give unadjusted estimates and, if applicable, confounder-adjusted estimates and their precision (eg, 95% confidence interval). Make clear which confounders were adjusted for and why they were included | 12-14  |
|                          |    | (b) Report category boundaries when continuous variables were categorized                                                                                                                                    | N/A    |
|                          |    | (c) If relevant, consider translating estimates of relative risk into absolute risk for a meaningful time period                                                                                             | N/A    |
| Other analyses           | 17 | Report other analyses done—eg analyses of subgroups and interactions, and sensitivity analyses                                                                                                               | 10-14  |
| <b>Discussion</b>        |    |                                                                                                                                                                                                              |        |
| Key results              | 18 | Summarise key results with reference to study objectives                                                                                                                                                     | 14, 20 |
| Limitations              | 19 | Discuss limitations of the study, taking into account sources of potential bias or imprecision. Discuss both direction and magnitude of any potential bias                                                   | 19     |
| Interpretation           | 20 | Give a cautious overall interpretation of results considering objectives, limitations, multiplicity of analyses, results from similar studies, and other relevant evidence                                   | 14-20  |
| Generalisability         | 21 | Discuss the generalisability (external validity) of the study results                                                                                                                                        | 19-20  |
| <b>Other information</b> |    |                                                                                                                                                                                                              |        |
| Funding                  | 22 | Give the source of funding and the role of the funders for the present study and, if applicable, for the original study on which the present article is based                                                | 20     |

\*Give information separately for exposed and unexposed groups.

**Note:** An Explanation and Elaboration article discusses each checklist item and gives methodological background and published examples of transparent reporting. The STROBE checklist is best used in conjunction with this article (freely available on the Web sites of PLoS Medicine at <http://www.plosmedicine.org/>, Annals of Internal Medicine at <http://www.annals.org/>, and Epidemiology at <http://www.epidem.com/>). Information on the STROBE Initiative is available at [www.strobe-statement.org](http://www.strobe-statement.org).
